# Supplementary material for: Green Light Partial Replacement of Red and Blue Light Improved Drought Tolerance by Regulating Water Use Efficiency in Cucumber Seedlings
Source: Front Plant Sci. 2022 May 31;13:878932. doi: 10.3389/fpls.2022.878932 (PMC9194611; doi:10.3389/fpls.2022.878932)
Supplement: Supplementary file 2 [file Table_2.XLSX]

## Sheet: PPFD
wave length(nm)	RB	RBG25	RBG50	RBG75
350	0.129684	0.184068	0.163616	0.143164
350.1	0.130214	0.184392	0.163904	0.143416
350.2	0.130742	0.184716	0.164192	0.143668
350.3	0.13127	0.185022	0.164464	0.143906
350.4	0.1318	0.185346	0.164752	0.144158
350.5	0.132328	0.18567	0.16504	0.14441
350.6	0.132858	0.185994	0.165328	0.144662
350.7	0.133386	0.186318	0.165616	0.144914
350.8	0.133914	0.186642	0.165904	0.145166
350.9	0.134444	0.186966	0.166192	0.145418
351	0.134972	0.187272	0.166464	0.145656
351.1	0.135658	0.190044	0.168928	0.147812
351.2	0.136384	0.193464	0.171968	0.150472
351.3	0.13711	0.196884	0.175008	0.153132
351.4	0.137836	0.200322	0.178064	0.155806
351.5	0.138562	0.203742	0.181104	0.158466
351.6	0.139288	0.207162	0.184144	0.161126
351.7	0.140016	0.210582	0.187184	0.163786
351.8	0.140742	0.214002	0.190224	0.166446
351.9	0.141468	0.21744	0.19328	0.16912
352	0.142194	0.22086	0.19632	0.17178
352.1	0.14292	0.22428	0.19936	0.17444
352.2	0.143646	0.2277	0.2024	0.1771
352.3	0.144372	0.23112	0.20544	0.17976
352.4	0.1451	0.23454	0.20848	0.18242
352.5	0.145826	0.237978	0.211536	0.185094
352.6	0.146552	0.241398	0.214576	0.187754
352.7	0.147278	0.244818	0.217616	0.190414
352.8	0.148004	0.248238	0.220656	0.193074
352.9	0.14873	0.251658	0.223696	0.195734
353	0.149458	0.255096	0.226752	0.198408
353.1	0.150184	0.258516	0.229792	0.201068
353.2	0.15091	0.261936	0.232832	0.203728
353.3	0.151636	0.265356	0.235872	0.206388
353.4	0.152362	0.268776	0.238912	0.209048
353.5	0.153088	0.272196	0.241952	0.211708
353.6	0.153814	0.275634	0.245008	0.214382
353.7	0.154542	0.279054	0.248048	0.217042
353.8	0.156084	0.27819	0.24728	0.21637
353.9	0.157656	0.277164	0.246368	0.215572
354	0.159228	0.276156	0.245472	0.214788
354.1	0.160802	0.27513	0.24456	0.21399
354.2	0.162374	0.274104	0.243648	0.213192
354.3	0.163946	0.273096	0.242752	0.212408
354.4	0.165518	0.27207	0.24184	0.21161
354.5	0.16709	0.271062	0.240944	0.210826
354.6	0.168664	0.270036	0.240032	0.210028
354.7	0.170236	0.26901	0.23912	0.20923
354.8	0.171808	0.268002	0.238224	0.208446
354.9	0.17338	0.266976	0.237312	0.207648
355	0.174952	0.265968	0.236416	0.206864
355.1	0.176526	0.264942	0.235504	0.206066
355.2	0.178098	0.263916	0.234592	0.205268
355.3	0.17967	0.262908	0.233696	0.204484
355.4	0.181242	0.261882	0.232784	0.203686
355.5	0.182816	0.260874	0.231888	0.202902
355.6	0.184388	0.259848	0.230976	0.202104
355.7	0.18596	0.258822	0.230064	0.201306
355.8	0.187532	0.257814	0.229168	0.200522
355.9	0.189104	0.256788	0.228256	0.199724
356	0.190678	0.25578	0.22736	0.19894
356.1	0.19225	0.254754	0.226448	0.198142
356.2	0.193822	0.253728	0.225536	0.197344
356.3	0.195394	0.25272	0.22464	0.19656
356.4	0.196198	0.251298	0.223376	0.195454
356.5	0.193484	0.248076	0.220512	0.192948
356.6	0.190768	0.244836	0.217632	0.190428
356.7	0.188054	0.241596	0.214752	0.187908
356.8	0.18534	0.238374	0.211888	0.185402
356.9	0.182626	0.235134	0.209008	0.182882
357	0.17991	0.231912	0.206144	0.180376
357.1	0.177196	0.228672	0.203264	0.177856
357.2	0.174482	0.22545	0.2004	0.17535
357.3	0.171768	0.22221	0.19752	0.17283
357.4	0.169052	0.21897	0.19464	0.17031
357.5	0.166338	0.215748	0.191776	0.167804
357.6	0.163622	0.212508	0.188896	0.165284
357.7	0.160908	0.209286	0.186032	0.162778
357.8	0.158194	0.206046	0.183152	0.160258
357.9	0.15548	0.202824	0.180288	0.157752
358	0.152764	0.199584	0.177408	0.155232
358.1	0.15005	0.196344	0.174528	0.152712
358.2	0.147334	0.193122	0.171664	0.150206
358.3	0.14462	0.189882	0.168784	0.147686
358.4	0.141906	0.18666	0.16592	0.14518
358.5	0.139192	0.18342	0.16304	0.14266
358.6	0.136476	0.180198	0.160176	0.140154
358.7	0.133762	0.17696	0.157298	0.137635
358.8	0.131048	0.173727	0.154424	0.135121
358.9	0.128332	0.170496	0.151552	0.132608
359	0.125618	0.167263	0.148678	0.130094
359.1	0.123628	0.167337	0.148744	0.130151
359.2	0.122594	0.171776	0.15269	0.133603
359.3	0.121562	0.176213	0.156634	0.137054
359.4	0.120528	0.180648	0.160576	0.140504
359.5	0.119496	0.185094	0.164528	0.143962
359.6	0.118462	0.18954	0.16848	0.14742
359.7	0.117428	0.193968	0.172416	0.150864
359.8	0.116396	0.198414	0.176368	0.154322
359.9	0.115362	0.202842	0.180304	0.157766
360	0.11433	0.207288	0.184256	0.161224
360.1	0.113296	0.211734	0.188208	0.164682
360.2	0.112264	0.216162	0.192144	0.168126
360.3	0.11123	0.220608	0.196096	0.171584
360.4	0.110196	0.225036	0.200032	0.175028
360.5	0.109164	0.229482	0.203984	0.178486
360.6	0.10813	0.233928	0.207936	0.181944
360.7	0.107098	0.238356	0.211872	0.185388
360.8	0.106064	0.242802	0.215824	0.188846
360.9	0.105032	0.24723	0.21976	0.19229
361	0.103998	0.251676	0.223712	0.195748
361.1	0.102964	0.256122	0.227664	0.199206
361.2	0.101932	0.26055	0.2316	0.20265
361.3	0.100898	0.264996	0.235552	0.206108
361.4	0.099866	0.269424	0.239488	0.209552
361.5	0.098832	0.27387	0.24344	0.21301
361.6	0.097798	0.278316	0.247392	0.216468
361.7	0.096766	0.282744	0.251328	0.219912
361.8	0.098596	0.280188	0.249056	0.217924
361.9	0.101534	0.274896	0.244352	0.213808
362	0.104474	0.269622	0.239664	0.209706
362.1	0.107412	0.26433	0.23496	0.20559
362.2	0.110352	0.259038	0.230256	0.201474
362.3	0.11329	0.253764	0.225568	0.197372
362.4	0.116228	0.248472	0.220864	0.193256
362.5	0.119168	0.243198	0.216176	0.189154
362.6	0.122106	0.237906	0.211472	0.185038
362.7	0.125046	0.232632	0.206784	0.180936
362.8	0.127984	0.22734	0.20208	0.17682
362.9	0.130922	0.222066	0.197392	0.172718
363	0.133862	0.216774	0.192688	0.168602
363.1	0.1368	0.2115	0.188	0.1645
363.2	0.13974	0.206208	0.183296	0.160384
363.3	0.142678	0.200934	0.178608	0.156282
363.4	0.145618	0.195642	0.173904	0.152166
363.5	0.148556	0.190368	0.169216	0.148064
363.6	0.151496	0.185076	0.164512	0.143948
363.7	0.154434	0.179797	0.159819	0.139842
363.8	0.157372	0.174514	0.155123	0.135733
363.9	0.160312	0.169231	0.150427	0.131624
364	0.16325	0.163946	0.14573	0.127513
364.1	0.16619	0.158663	0.141034	0.123404
364.2	0.169128	0.15338	0.136338	0.119295
364.3	0.172066	0.148097	0.131642	0.115186
364.4	0.17471	0.143132	0.127229	0.111325
364.5	0.171656	0.144347	0.128309	0.11227
364.6	0.168602	0.145561	0.129387	0.113214
364.7	0.165548	0.146774	0.130466	0.114157
364.8	0.162496	0.147987	0.131544	0.115101
364.9	0.15944	0.149202	0.132624	0.116046
365	0.156386	0.150415	0.133702	0.11699
365.1	0.153332	0.151628	0.134781	0.117933
365.2	0.150278	0.152843	0.135861	0.118878
365.3	0.147226	0.154057	0.136939	0.119822
365.4	0.14417	0.15527	0.138018	0.120765
365.5	0.141116	0.156483	0.139096	0.121709
365.6	0.138062	0.157698	0.140176	0.122654
365.7	0.135008	0.158911	0.141254	0.123598
365.8	0.131956	0.160124	0.142333	0.124541
365.9	0.128902	0.161338	0.143411	0.125485
366	0.125846	0.162553	0.144491	0.12643
366.1	0.122792	0.163766	0.14557	0.127373
366.2	0.119738	0.164979	0.146648	0.128317
366.3	0.116686	0.166192	0.147726	0.129261
366.4	0.113632	0.167407	0.148806	0.130206
366.5	0.110576	0.16862	0.149885	0.131149
366.6	0.107522	0.169834	0.150963	0.132093
366.7	0.104468	0.171049	0.152043	0.133038
366.8	0.101416	0.172262	0.153122	0.133981
366.9	0.098362	0.173475	0.1542	0.134925
367	0.095306	0.174688	0.155278	0.135869
367.1	0.092014	0.173327	0.154069	0.13481
367.2	0.088388	0.168349	0.149643	0.130938
367.3	0.08476	0.163372	0.145219	0.127067
367.4	0.081134	0.158395	0.140795	0.123196
367.5	0.077506	0.153416	0.13637	0.119323
367.6	0.07388	0.148439	0.131946	0.115452
367.7	0.070252	0.14346	0.12752	0.11158
367.8	0.066626	0.138483	0.123096	0.107709
367.9	0.062998	0.133506	0.118672	0.103838
368	0.059372	0.128527	0.114246	0.0999656
368.1	0.055744	0.12355	0.109822	0.0960946
368.2	0.052116	0.118571	0.105397	0.0922222
368.3	0.04849	0.113594	0.100973	0.0883512
368.4	0.044864	0.108617	0.0965488	0.0844802
368.5	0.041236	0.103639	0.0921232	0.0806078
368.6	0.037608	0.0986616	0.0876992	0.0767368
368.7	0.033982	0.0936828	0.0832736	0.0728644
368.8	0.030356	0.0887058	0.0788496	0.0689934
368.9	0.026728	0.0837288	0.0744256	0.0651224
369	0.0231	0.07875	0.07	0.06125
369.1	0.0194734	0.073773	0.065576	0.057379
369.2	0.0158462	0.0687942	0.0611504	0.0535066
369.3	0.01222	0.0638172	0.0567264	0.0496356
369.4	0.0085926	0.0588402	0.0523024	0.0457646
369.5	0.0049654	0.0538614	0.0478768	0.0418922
369.6	0.00133816	0.0488844	0.0434528	0.0380212
369.7	0	0.0439056	0.0390272	0.0341488
369.8	0.0008754	0.0454752	0.0404224	0.0353696
369.9	0.0055146	0.0484668	0.0430816	0.0376964
370	0.0101536	0.0514584	0.0457408	0.0400232
370.1	0.0147928	0.0544518	0.0484016	0.0423514
370.2	0.0194318	0.0574434	0.0510608	0.0446782
370.3	0.02407	0.0604332	0.0537184	0.0470036
370.4	0.028708	0.0634248	0.0563776	0.0493304
370.5	0.033348	0.0664164	0.0590368	0.0516572
370.6	0.037986	0.069408	0.061696	0.053984
370.7	0.042626	0.0723996	0.0643552	0.0563108
370.8	0.047264	0.0753912	0.0670144	0.0586376
370.9	0.051902	0.0783828	0.0696736	0.0609644
371	0.056542	0.0813744	0.0723328	0.0632912
371.1	0.06118	0.084366	0.074992	0.065618
371.2	0.06582	0.0873576	0.0776512	0.0679448
371.3	0.070458	0.0903474	0.0803088	0.0702702
371.4	0.075096	0.093339	0.082968	0.072597
371.5	0.079736	0.0963306	0.0856272	0.0749238
371.6	0.084376	0.0993222	0.0882864	0.0772506
371.7	0.089014	0.102314	0.0909456	0.0795774
371.8	0.093652	0.105305	0.0936048	0.0819042
371.9	0.09829	0.108297	0.096264	0.084231
372	0.10293	0.111289	0.0989232	0.0865578
372.1	0.10757	0.11428	0.101582	0.0888846
372.2	0.112208	0.117272	0.104242	0.0912114
372.3	0.116846	0.120262	0.106899	0.0935368
372.4	0.12	0.122085	0.10852	0.094955
372.5	0.119062	0.12069	0.10728	0.09387
372.6	0.118124	0.119297	0.106042	0.0927864
372.7	0.117188	0.117902	0.104802	0.0917014
372.8	0.11625	0.116507	0.103562	0.0906164
372.9	0.115312	0.115112	0.102322	0.0895314
373	0.114376	0.113719	0.101083	0.0884478
373.1	0.113438	0.112324	0.0998432	0.0873628
373.2	0.1125	0.110929	0.0986032	0.0862778
373.3	0.111564	0.109534	0.0973632	0.0851928
373.4	0.110626	0.108139	0.0961232	0.0841078
373.5	0.10969	0.106745	0.0948848	0.0830242
373.6	0.108752	0.10535	0.0936448	0.0819392
373.7	0.107814	0.103955	0.0924048	0.0808542
373.8	0.106878	0.10256	0.0911648	0.0797692
373.9	0.10594	0.101165	0.0899248	0.0786842
374	0.105002	0.0997722	0.0886864	0.0776006
374.1	0.104066	0.0983772	0.0874464	0.0765156
374.2	0.103128	0.0969822	0.0862064	0.0754306
374.3	0.10219	0.0955872	0.0849664	0.0743456
374.4	0.101254	0.0941922	0.0837264	0.0732606
374.5	0.100316	0.092799	0.082488	0.072177
374.6	0.099378	0.091404	0.081248	0.071092
374.7	0.098442	0.090009	0.080008	0.070007
374.8	0.097504	0.088614	0.078768	0.068922
374.9	0.096566	0.0872208	0.0775296	0.0678384
375	0.09563	0.0858258	0.0762896	0.0667534
375.1	0.096008	0.0862686	0.0766832	0.0670978
375.2	0.096824	0.0873198	0.0776176	0.0679154
375.3	0.09764	0.0883728	0.0785536	0.0687344
375.4	0.098456	0.089424	0.079488	0.069552
375.5	0.099272	0.090477	0.080424	0.070371
375.6	0.100088	0.0915282	0.0813584	0.0711886
375.7	0.100904	0.0925812	0.0822944	0.0720076
375.8	0.10172	0.0936324	0.0832288	0.0728252
375.9	0.102534	0.0946854	0.0841648	0.0736442
376	0.10335	0.0957366	0.0850992	0.0744618
376.1	0.104166	0.0967896	0.0860352	0.0752808
376.2	0.104982	0.0978426	0.0869712	0.0760998
376.3	0.105798	0.0988938	0.0879056	0.0769174
376.4	0.106614	0.099945	0.08884	0.077735
376.5	0.10743	0.100998	0.089776	0.078554
376.6	0.108246	0.102051	0.090712	0.079373
376.7	0.109062	0.103102	0.0916464	0.0801906
376.8	0.109876	0.104153	0.0925808	0.0810082
376.9	0.110692	0.105206	0.0935168	0.0818272
377	0.111508	0.106259	0.0944528	0.0826462
377.1	0.112324	0.107311	0.0953872	0.0834638
377.2	0.11314	0.108364	0.0963232	0.0842828
377.3	0.113956	0.109415	0.0972576	0.0851004
377.4	0.114772	0.110468	0.0981936	0.0859194
377.5	0.115588	0.111519	0.099128	0.086737
377.6	0.116404	0.112572	0.100064	0.087556
377.7	0.117162	0.114093	0.101416	0.088739
377.8	0.117774	0.116856	0.103872	0.090888
377.9	0.118386	0.119617	0.106326	0.0930356
378	0.118996	0.12238	0.108782	0.0951846
378.1	0.119608	0.125143	0.111238	0.0973336
378.2	0.12022	0.127904	0.113693	0.0994812
378.3	0.12083	0.130667	0.116149	0.10163
378.4	0.121442	0.133429	0.118603	0.103778
378.5	0.122054	0.136192	0.121059	0.105927
378.6	0.122664	0.138955	0.123515	0.108076
378.7	0.123276	0.141716	0.12597	0.110223
378.8	0.123888	0.144479	0.128426	0.112372
378.9	0.124498	0.14724	0.13088	0.11452
379	0.12511	0.150003	0.133336	0.116669
379.1	0.125722	0.152766	0.135792	0.118818
379.2	0.126332	0.155527	0.138246	0.120966
379.3	0.126944	0.15829	0.140702	0.123115
379.4	0.127556	0.161051	0.143157	0.125262
379.5	0.128166	0.163814	0.145613	0.127411
379.6	0.128778	0.166577	0.148069	0.12956
379.7	0.12939	0.169339	0.150523	0.131708
379.8	0.13	0.172102	0.152979	0.133857
379.9	0.130612	0.174863	0.155434	0.136004
380	0.131224	0.177626	0.15789	0.138153
380.1	0.131834	0.180396	0.160352	0.140308
380.2	0.132446	0.18315	0.1628	0.14245
380.3	0.133058	0.185904	0.165248	0.144592
380.4	0.133606	0.186498	0.165776	0.145054
380.5	0.134144	0.186678	0.165936	0.145194
380.6	0.134682	0.18684	0.16608	0.14532
380.7	0.13522	0.18702	0.16624	0.14546
380.8	0.135758	0.1872	0.1664	0.1456
380.9	0.136296	0.187362	0.166544	0.145726
381	0.136834	0.187542	0.166704	0.145866
381.1	0.137372	0.187704	0.166848	0.145992
381.2	0.13791	0.187884	0.167008	0.146132
381.3	0.138448	0.188046	0.167152	0.146258
381.4	0.138986	0.188226	0.167312	0.146398
381.5	0.139524	0.188388	0.167456	0.146524
381.6	0.140062	0.188568	0.167616	0.146664
381.7	0.1406	0.188748	0.167776	0.146804
381.8	0.141138	0.18891	0.16792	0.14693
381.9	0.141676	0.18909	0.16808	0.14707
382	0.142214	0.189252	0.168224	0.147196
382.1	0.142752	0.189432	0.168384	0.147336
382.2	0.14329	0.189594	0.168528	0.147462
382.3	0.143826	0.189774	0.168688	0.147602
382.4	0.144364	0.189936	0.168832	0.147728
382.5	0.144902	0.190116	0.168992	0.147868
382.6	0.14544	0.190278	0.169136	0.147994
382.7	0.145978	0.190458	0.169296	0.148134
382.8	0.146516	0.190638	0.169456	0.148274
382.9	0.147054	0.1908	0.1696	0.1484
383	0.14841	0.191178	0.169936	0.148694
383.1	0.150798	0.191826	0.170512	0.149198
383.2	0.153186	0.192456	0.171072	0.149688
383.3	0.155574	0.193104	0.171648	0.150192
383.4	0.157962	0.193752	0.172224	0.150696
383.5	0.16035	0.194382	0.172784	0.151186
383.6	0.162738	0.19503	0.17336	0.15169
383.7	0.165126	0.195678	0.173936	0.152194
383.8	0.167514	0.196308	0.174496	0.152684
383.9	0.169902	0.196956	0.175072	0.153188
384	0.17229	0.197604	0.175648	0.153692
384.1	0.174678	0.198234	0.176208	0.154182
384.2	0.177066	0.198882	0.176784	0.154686
384.3	0.179452	0.199512	0.177344	0.155176
384.4	0.18184	0.20016	0.17792	0.15568
384.5	0.184228	0.200808	0.178496	0.156184
384.6	0.186616	0.201438	0.179056	0.156674
384.7	0.189004	0.202086	0.179632	0.157178
384.8	0.191392	0.202734	0.180208	0.157682
384.9	0.19378	0.203364	0.180768	0.158172
385	0.196168	0.204012	0.181344	0.158676
385.1	0.198556	0.204642	0.181904	0.159166
385.2	0.20094	0.20529	0.18248	0.15967
385.3	0.20334	0.205938	0.183056	0.160174
385.4	0.20572	0.206568	0.183616	0.160664
385.5	0.2081	0.207216	0.184192	0.161168
385.6	0.20996	0.207396	0.184352	0.161308
385.7	0.20622	0.202716	0.180192	0.157668
385.8	0.2025	0.198054	0.176048	0.154042
385.9	0.198752	0.193374	0.171888	0.150402
386	0.195014	0.188694	0.167728	0.146762
386.1	0.191276	0.184032	0.163584	0.143136
386.2	0.187538	0.179352	0.159424	0.139496
386.3	0.1838	0.174677	0.155269	0.13586
386.4	0.180062	0.170003	0.151114	0.132224
386.5	0.176324	0.16533	0.14696	0.12859
386.6	0.172586	0.160655	0.142805	0.124954
386.7	0.168848	0.155981	0.13865	0.121318
386.8	0.16511	0.151306	0.134494	0.117683
386.9	0.161372	0.146633	0.130341	0.114048
387	0.157634	0.141959	0.126186	0.110412
387.1	0.153896	0.137284	0.12203	0.106777
387.2	0.150158	0.13261	0.117875	0.103141
387.3	0.14642	0.127937	0.113722	0.0995064
387.4	0.142682	0.123262	0.109566	0.0958706
387.5	0.138944	0.118588	0.105411	0.0922348
387.6	0.135206	0.113913	0.101256	0.088599
387.7	0.131468	0.109238	0.0971008	0.0849632
387.8	0.12773	0.104566	0.0929472	0.0813288
387.9	0.123992	0.099891	0.088792	0.077693
388	0.120254	0.0952164	0.0846368	0.0740572
388.1	0.116516	0.0905418	0.0804816	0.0704214
388.2	0.112778	0.0858672	0.0763264	0.0667856
388.3	0.111758	0.0856224	0.0761088	0.0665952
388.4	0.111544	0.0866916	0.0770592	0.0674268
388.5	0.11133	0.0877608	0.0780096	0.0682584
388.6	0.111116	0.0888318	0.0789616	0.0690914
388.7	0.110902	0.089901	0.079912	0.069923
388.8	0.11069	0.0909702	0.0808624	0.0707546
388.9	0.110476	0.0920412	0.0818144	0.0715876
389	0.110262	0.0931104	0.0827648	0.0724192
389.1	0.110048	0.0941796	0.0837152	0.0732508
389.2	0.109834	0.0952506	0.0846672	0.0740838
389.3	0.10962	0.0963198	0.0856176	0.0749154
389.4	0.109408	0.097389	0.086568	0.075747
389.5	0.109194	0.09846	0.08752	0.07658
389.6	0.10898	0.0995292	0.0884704	0.0774116
389.7	0.108766	0.100598	0.0894208	0.0782432
389.8	0.108552	0.101669	0.0903728	0.0790762
389.9	0.108338	0.102739	0.0913232	0.0799078
390	0.108126	0.103808	0.0922736	0.0807394
390.1	0.107912	0.104879	0.0932256	0.0815724
390.2	0.107698	0.105948	0.094176	0.082404
390.3	0.107484	0.107017	0.0951264	0.0832356
390.4	0.10727	0.108086	0.0960768	0.0840672
390.5	0.107056	0.109157	0.0970288	0.0849002
390.6	0.106844	0.110227	0.0979792	0.0857318
390.7	0.10663	0.111298	0.0989312	0.0865648
390.8	0.106416	0.112367	0.0998816	0.0873964
390.9	0.10459	0.113663	0.101034	0.0884044
391	0.10113	0.115187	0.102389	0.0895902
391.1	0.09767	0.116712	0.103744	0.090776
391.2	0.094212	0.118238	0.105101	0.0919632
391.3	0.090754	0.119763	0.106456	0.093149
391.4	0.087294	0.121288	0.107811	0.0943348
391.5	0.083834	0.122814	0.109168	0.095522
391.6	0.080376	0.124339	0.110523	0.0967078
391.7	0.076916	0.125863	0.111878	0.0978936
391.8	0.073458	0.127388	0.113234	0.0990794
391.9	0.069998	0.128914	0.11459	0.100267
392	0.066538	0.130439	0.115946	0.101452
392.1	0.06308	0.131963	0.117301	0.102638
392.2	0.05962	0.13349	0.118658	0.103825
392.3	0.056162	0.135014	0.120013	0.105011
392.4	0.052702	0.136539	0.121368	0.106197
392.5	0.049244	0.138064	0.122723	0.107383
392.6	0.045784	0.13959	0.12408	0.10857
392.7	0.042324	0.141115	0.125435	0.109756
392.8	0.038866	0.142639	0.12679	0.110942
392.9	0.035406	0.144164	0.128146	0.112127
393	0.031948	0.14569	0.129502	0.113315
393.1	0.028488	0.147215	0.130858	0.1145
393.2	0.025028	0.148739	0.132213	0.115686
393.3	0.02157	0.150266	0.13357	0.116873
393.4	0.0181112	0.15179	0.134925	0.118059
393.5	0.0177418	0.153481	0.136427	0.119374
393.6	0.026002	0.155633	0.138341	0.121048
393.7	0.034262	0.157786	0.140254	0.122723
393.8	0.042518	0.159937	0.142166	0.124396
393.9	0.050778	0.16209	0.14408	0.12607
394	0.059038	0.164243	0.145994	0.127744
394.1	0.067298	0.166396	0.147907	0.129419
394.2	0.075558	0.168548	0.149821	0.131093
394.3	0.083814	0.170699	0.151733	0.132766
394.4	0.092074	0.172852	0.153646	0.134441
394.5	0.100334	0.175005	0.15556	0.136115
394.6	0.108594	0.177158	0.157474	0.137789
394.7	0.116854	0.179311	0.159387	0.139464
394.8	0.12511	0.181458	0.161296	0.141134
394.9	0.13337	0.183618	0.163216	0.142814
395	0.14163	0.18576	0.16512	0.14448
395.1	0.14989	0.18792	0.16704	0.14616
395.2	0.15815	0.19008	0.16896	0.14784
395.3	0.166406	0.192222	0.170864	0.149506
395.4	0.174666	0.194382	0.172784	0.151186
395.5	0.182926	0.196524	0.174688	0.152852
395.6	0.191186	0.198684	0.176608	0.154532
395.7	0.199446	0.200826	0.178512	0.156198
395.8	0.2077	0.202986	0.180432	0.157878
395.9	0.21596	0.205146	0.182352	0.159558
396	0.22422	0.207288	0.184256	0.161224
396.1	0.23194	0.209538	0.186256	0.162974
396.2	0.23264	0.21312	0.18944	0.16576
396.3	0.23332	0.216702	0.192624	0.168546
396.4	0.23402	0.220284	0.195808	0.171332
396.5	0.2347	0.223866	0.198992	0.174118
396.6	0.2354	0.227448	0.202176	0.176904
396.7	0.2361	0.23103	0.20536	0.17969
396.8	0.23678	0.234612	0.208544	0.182476
396.9	0.23748	0.238176	0.211712	0.185248
397	0.23816	0.241758	0.214896	0.188034
397.1	0.23886	0.24534	0.21808	0.19082
397.2	0.23956	0.248922	0.221264	0.193606
397.3	0.24024	0.252504	0.224448	0.196392
397.4	0.24094	0.256086	0.227632	0.199178
397.5	0.24162	0.259668	0.230816	0.201964
397.6	0.24232	0.26325	0.234	0.20475
397.7	0.243	0.266832	0.237184	0.207536
397.8	0.2437	0.270396	0.240352	0.210308
397.9	0.2444	0.273978	0.243536	0.213094
398	0.24508	0.27756	0.24672	0.21588
398.1	0.24578	0.281142	0.249904	0.218666
398.2	0.24646	0.284724	0.253088	0.221452
398.3	0.24716	0.288306	0.256272	0.224238
398.4	0.24786	0.291888	0.259456	0.227024
398.5	0.24854	0.29547	0.26264	0.22981
398.6	0.24924	0.299034	0.265808	0.232582
398.7	0.24992	0.302616	0.268992	0.235368
398.8	0.25154	0.306342	0.272304	0.238266
398.9	0.25324	0.310086	0.275632	0.241178
399	0.25492	0.31383	0.27896	0.24409
399.1	0.25662	0.317574	0.282288	0.247002
399.2	0.25832	0.321318	0.285616	0.249914
399.3	0.26	0.325044	0.288928	0.252812
399.4	0.2617	0.328788	0.292256	0.255724
399.5	0.26338	0.332532	0.295584	0.258636
399.6	0.26508	0.336276	0.298912	0.261548
399.7	0.26678	0.34002	0.30224	0.26446
399.8	0.26846	0.343746	0.305552	0.267358
399.9	0.27016	0.34749	0.30888	0.27027
400	0.27186	0.351234	0.312208	0.273182
400.1	0.27332	0.354672	0.315264	0.275856
400.2	0.27478	0.35811	0.31832	0.27853
400.3	0.27622	0.361548	0.321376	0.281204
400.4	0.27768	0.364968	0.324416	0.283864
400.5	0.27914	0.368406	0.327472	0.286538
400.6	0.2806	0.371826	0.330512	0.289198
400.7	0.28206	0.375246	0.333552	0.291858
400.8	0.28352	0.378648	0.336576	0.294504
400.9	0.28496	0.382068	0.339616	0.297164
401	0.28642	0.38547	0.34264	0.29981
401.1	0.28788	0.388872	0.345664	0.302456
401.2	0.28932	0.392274	0.348688	0.305102
401.3	0.29078	0.395676	0.351712	0.307748
401.4	0.28852	0.395082	0.351184	0.307286
401.5	0.28544	0.393552	0.349824	0.306096
401.6	0.28238	0.392058	0.348496	0.304934
401.7	0.27932	0.390564	0.347168	0.303772
401.8	0.27628	0.389088	0.345856	0.302624
401.9	0.27326	0.387612	0.344544	0.301476
402	0.27024	0.386154	0.343248	0.300342
402.1	0.26726	0.384696	0.341952	0.299208
402.2	0.26428	0.383256	0.340672	0.298088
402.3	0.26132	0.381816	0.339392	0.296968
402.4	0.25836	0.380394	0.338128	0.295862
402.5	0.25542	0.378972	0.336864	0.294756
402.6	0.2525	0.377568	0.335616	0.293664
402.7	0.2496	0.376164	0.334368	0.292572
402.8	0.2467	0.374778	0.333136	0.291494
402.9	0.24382	0.37341	0.33192	0.29043
403	0.24096	0.372042	0.330704	0.289366
403.1	0.2381	0.370674	0.329488	0.288302
403.2	0.23526	0.369324	0.328288	0.287252
403.3	0.23244	0.367974	0.327088	0.286202
403.4	0.22962	0.366642	0.325904	0.285166
403.5	0.22682	0.36531	0.32472	0.28413
403.6	0.22402	0.363996	0.323552	0.283108
403.7	0.22124	0.362682	0.322384	0.282086
403.8	0.21848	0.361368	0.321216	0.281064
403.9	0.21572	0.360072	0.320064	0.280056
404	0.22014	0.364158	0.323696	0.283234
404.1	0.22698	0.370044	0.328928	0.287812
404.2	0.23382	0.375966	0.334192	0.292418
404.3	0.24068	0.38187	0.33944	0.29701
404.4	0.24754	0.387792	0.344704	0.301616
404.5	0.25442	0.393714	0.349968	0.306222
404.6	0.2613	0.399636	0.355232	0.310828
404.7	0.26818	0.405558	0.360496	0.315434
404.8	0.27506	0.411498	0.365776	0.320054
404.9	0.28196	0.417438	0.371056	0.324674
405	0.28886	0.423396	0.376352	0.329308
405.1	0.29578	0.429354	0.381648	0.333942
405.2	0.30268	0.435312	0.386944	0.338576
405.3	0.3096	0.44127	0.39224	0.34321
405.4	0.31654	0.447246	0.397552	0.347858
405.5	0.32346	0.453222	0.402864	0.352506
405.6	0.3304	0.459216	0.408192	0.357168
405.7	0.33736	0.465192	0.413504	0.361816
405.8	0.3443	0.471186	0.418832	0.366478
405.9	0.35126	0.477198	0.424176	0.371154
406	0.35822	0.483192	0.429504	0.375816
406.1	0.3652	0.489204	0.434848	0.380492
406.2	0.37218	0.495234	0.440208	0.385182
406.3	0.37916	0.501246	0.445552	0.389858
406.4	0.38616	0.507276	0.450912	0.394548
406.5	0.39316	0.513306	0.456272	0.399238
406.6	0.39694	0.517932	0.460384	0.402836
406.7	0.39948	0.522018	0.464016	0.406014
406.8	0.402	0.526104	0.467648	0.409192
406.9	0.40454	0.53019	0.47128	0.41237
407	0.40708	0.534276	0.474912	0.415548
407.1	0.40962	0.538362	0.478544	0.418726
407.2	0.41216	0.54243	0.48216	0.42189
407.3	0.41468	0.546516	0.485792	0.425068
407.4	0.41722	0.550584	0.489408	0.428232
407.5	0.41976	0.55467	0.49304	0.43141
407.6	0.4223	0.558738	0.496656	0.434574
407.7	0.42482	0.562806	0.500272	0.437738
407.8	0.42736	0.566892	0.503904	0.440916
407.9	0.42988	0.57096	0.50752	0.44408
408	0.43242	0.575028	0.511136	0.447244
408.1	0.43496	0.579096	0.514752	0.450408
408.2	0.43748	0.583164	0.518368	0.453572
408.3	0.44002	0.587232	0.521984	0.456736
408.4	0.44254	0.5913	0.5256	0.4599
408.5	0.44508	0.595368	0.529216	0.463064
408.6	0.4476	0.599436	0.532832	0.466228				0
408.7	0.45014	0.603504	0.536448	0.469392				0
408.8	0.45266	0.607554	0.540048	0.472542				0
408.9	0.4552	0.611622	0.543664	0.475706				0
409	0.45772	0.61569	0.54728	0.47887				0
409.1	0.46026	0.61974	0.55088	0.48202				0
409.2	0.46736	0.626814	0.557168	0.487522				0
409.3	0.47606	0.634914	0.564368	0.493822				0
409.4	0.48474	0.643014	0.571568	0.500122				0
409.5	0.49344	0.651114	0.578768	0.506422				0
409.6	0.50212	0.659214	0.585968	0.512722				0
409.7	0.51078	0.667296	0.593152	0.519008				0
409.8	0.51946	0.675378	0.600336	0.525294				0
409.9	0.52812	0.68346	0.60752	0.53158				0
410	0.53678	0.691542	0.614704	0.537866				0
410.1	0.54542	0.699606	0.621872	0.544138				0
410.2	0.55408	0.707688	0.629056	0.550424				0
410.3	0.56272	0.715752	0.636224	0.556696				0
410.4	0.57136	0.723798	0.643376	0.562954				0
410.5	0.58	0.731862	0.650544	0.569226				0
410.6	0.58862	0.739926	0.657712	0.575498				0
410.7	0.59726	0.747972	0.664864	0.581756				0
410.8	0.60588	0.756018	0.672016	0.588014				0
410.9	0.6145	0.764064	0.679168	0.594272				0
411	0.62312	0.77211	0.68632	0.60053				0
411.1	0.63172	0.780138	0.693456	0.606774				0
411.2	0.64032	0.788184	0.700608	0.613032				0
411.3	0.64892	0.796212	0.707744	0.619276				0
411.4	0.65752	0.80424	0.71488	0.62552				0
411.5	0.66612	0.812268	0.722016	0.631764				0
411.6	0.67472	0.820278	0.729136	0.637994				0
411.7	0.6833	0.828306	0.736272	0.644238				0
411.8	0.6968	0.836604	0.743648	0.650692				0
411.9	0.71154	0.844974	0.751088	0.657202
412	0.72628	0.853362	0.758544	0.663726
412.1	0.74104	0.861768	0.766016	0.670264
412.2	0.75582	0.870174	0.773488	0.676802
412.3	0.77062	0.87858	0.78096	0.68334
412.4	0.78544	0.887004	0.788448	0.689892
412.5	0.80026	0.895446	0.795952	0.696458
412.6	0.81512	0.903906	0.803472	0.703038
412.7	0.83	0.912366	0.810992	0.709618
412.8	0.8449	0.920826	0.818512	0.716198
412.9	0.8598	0.929304	0.826048	0.722792
413	0.87474	0.9378	0.8336	0.7294
413.1	0.88968	0.946314	0.841168	0.736022
413.2	0.90466	0.954828	0.848736	0.742644
413.3	0.91964	0.963342	0.856304	0.749266
413.4	0.93466	0.971874	0.863888	0.755902
413.5	0.94968	0.980424	0.871488	0.762552
413.6	0.96472	0.988974	0.879088	0.769202
413.7	0.9798	0.997542	0.886704	0.775866
413.8	0.99488	1.00613	0.894336	0.782544
413.9	1.00998	1.01471	0.901968	0.789222
414	1.0251	1.0233	0.9096	0.7959
414.1	1.04024	1.03192	0.917264	0.802606
414.2	1.0554	1.04054	0.924928	0.809312
414.3	1.07058	1.04917	0.932592	0.816018				0
414.4	1.08038	1.06936	0.950544	0.831726				0
414.5	1.08966	1.09073	0.969536	0.848344				0
414.6	1.09896	1.11213	0.98856	0.86499				0
414.7	1.10824	1.13353	1.00758	0.881636				0
414.8	1.11754	1.15495	1.02662	0.898296				0
414.9	1.12686	1.17641	1.0457	0.914984				0
415	1.13618	1.19788	1.06478	0.931686				0
415.1	1.1455	1.21937	1.08389	0.948402				0
415.2	1.15484	1.24087	1.10299	0.965118				0
415.3	1.16418	1.26239	1.12213	0.981862				0
415.4	1.17354	1.28394	1.14128	0.99862				0
415.5	1.1829	1.3055	1.16045	1.01539				0
415.6	1.19226	1.32709	1.17963	1.03218				0
415.7	1.20164	1.34869	1.19883	1.04898				0
415.8	1.21102	1.3703	1.21805	1.06579				0		0
415.9	1.22042	1.39196	1.2373	1.08263						0
416	1.22982	1.41361	1.25654	1.09948						0
416.1	1.23924	1.4353	1.27582	1.11635
416.2	1.24866	1.45699	1.2951	1.13322				0
416.3	1.2581	1.47872	1.31442	1.15011				0
416.4	1.26754	1.50044	1.33373	1.16701				0
416.5	1.27698	1.52221	1.35307	1.18394				0
416.6	1.28644	1.54399	1.37243	1.20088				0
416.7	1.2959	1.5658	1.39182	1.21785				0
416.8	1.30538	1.5876	1.4112	1.2348				0
416.9	1.31628	1.61003	1.43114	1.25224				0
417	1.35092	1.64209	1.45963	1.27718				0
417.1	1.3856	1.6742	1.48818	1.30215				0
417.2	1.42034	1.70635	1.51675	1.32716				0
417.3	1.45512	1.73855	1.54538	1.3522				0
417.4	1.48996	1.7708	1.57405	1.37729				0
417.5	1.52486	1.80306	1.60272	1.40238				0
417.6	1.55982	1.83546	1.63152	1.42758				0
417.7	1.59484	1.86786	1.66032	1.45278				0
417.8	1.62988	1.90026	1.68912	1.47798				0
417.9	1.665	1.93284	1.71808	1.50332				0
418	1.70016	1.96542	1.74704	1.52866				0
418.1	1.7354	1.998	1.776	1.554				0
418.2	1.77068	2.03058	1.80496	1.57934				0
418.3	1.806	2.06334	1.83408	1.60482				0
418.4	1.84138	2.0961	1.8632	1.6303				0
418.5	1.87682	2.12886	1.89232	1.65578				0
418.6	1.91232	2.1618	1.9216	1.6814				0
418.7	1.94788	2.19474	1.95088	1.70702				0
418.8	1.98348	2.22768	1.98016	1.73264				0
418.9	2.0192	2.26062	2.00944	1.75826				0
419	2.0548	2.29374	2.03888	1.78402				0
419.1	2.0906	2.32686	2.06832	1.80978				0
419.2	2.1264	2.35998	2.09776	1.83554				0
419.3	2.1624	2.3931	2.1272	1.8613				0
419.4	2.1982	2.4264	2.1568	1.8872				0
419.5	2.2364	2.46168	2.18816	1.91464				0
419.6	2.2816	2.50308	2.22496	1.94684				0
419.7	2.3268	2.54448	2.26176	1.97904				0
419.8	2.3722	2.58606	2.29872	2.01138				0
419.9	2.4176	2.62782	2.33584	2.04386				0
420	2.4632	2.66958	2.37296	2.07634				0
420.1	2.509	2.71152	2.41024	2.10896				0
420.2	2.5548	2.75346	2.44752	2.14158				0
420.3	2.6008	2.79558	2.48496	2.17434				0
420.4	2.6468	2.83788	2.52256	2.20724				0
420.5	2.693	2.88036	2.56032	2.24028				0
420.6	2.7394	2.92284	2.59808	2.27332				0
420.7	2.7858	2.96532	2.63584	2.30636				0
420.8	2.8324	3.00816	2.67392	2.33968				0
420.9	2.8792	3.051	2.712	2.373				0
421	2.926	3.09384	2.75008	2.40632				0
421.1	2.973	3.13704	2.78848	2.43992				0
421.2	3.0202	3.18006	2.82672	2.47338				0
421.3	3.0674	3.22344	2.86528	2.50712				0
421.4	3.1148	3.26682	2.90384	2.54086				0
421.5	3.1622	3.31038	2.94256	2.57474
421.6	3.2098	3.35394	2.98128	2.60862
421.7	3.2576	3.39768	3.02016	2.64264
421.8	3.3054	3.4416	3.0592	2.6768
421.9	3.3534	3.48552	3.09824	2.71096
422	3.4016	3.52962	3.13744	2.74526
422.1	3.4588	3.58668	3.18816	2.78964
422.2	3.5256	3.6576	3.2512	2.8448
422.3	3.5924	3.72834	3.31408	2.89982
422.4	3.6594	3.79926	3.37712	2.95498
422.5	3.7262	3.87018	3.44016	3.01014
422.6	3.7932	3.9411	3.5032	3.0653
422.7	3.8602	4.0122	3.5664	3.1206
422.8	3.9272	4.08312	3.62944	3.17576
422.9	3.9942	4.15422	3.69264	3.23106
423	4.0614	4.22532	3.75584	3.28636
423.1	4.1286	4.29642	3.81904	3.34166
423.2	4.1958	4.3677	3.8824	3.3971
423.3	4.263	4.43898	3.94576	3.45254
423.4	4.3302	4.51026	4.00912	3.50798
423.5	4.3974	4.58154	4.07248	3.56342
423.6	4.4648	4.65282	4.13584	3.61886
423.7	4.5322	4.72428	4.19936	3.67444
423.8	4.5996	4.79574	4.26288	3.73002
423.9	4.667	4.8672	4.3264	3.7856
424	4.7346	4.93884	4.39008	3.84132
424.1	4.802	5.0103	4.4536	3.8969
424.2	4.8696	5.08194	4.51728	3.95262
424.3	4.9372	5.15358	4.58096	4.00834
424.4	5.005	5.22522	4.64464	4.06406
424.5	5.0726	5.29704	4.70848	4.11992
424.6	5.1404	5.36886	4.77232	4.17578
424.7	5.2264	5.4522	4.8464	4.2406
424.8	5.3182	5.53914	4.92368	4.30822
424.9	5.41	5.62608	5.00096	4.37584
425	5.5018	5.71302	5.07824	4.44346
425.1	5.5938	5.79996	5.15552	4.51108
425.2	5.6856	5.8869	5.2328	4.5787
425.3	5.7774	5.97384	5.31008	4.64632
425.4	5.8694	6.06096	5.38752	4.71408
425.5	5.9612	6.1479	5.4648	4.7817
425.6	6.0532	6.23502	5.54224	4.84946
425.7	6.145	6.32214	5.61968	4.91722
425.8	6.237	6.40908	5.69696	4.98484
425.9	6.329	6.4962	5.7744	5.0526
426	6.421	6.58332	5.85184	5.12036
426.1	6.513	6.67044	5.92928	5.18812
426.2	6.605	6.75756	6.00672	5.25588
426.3	6.697	6.84486	6.08432	5.32378
426.4	6.789	6.93198	6.16176	5.39154
426.5	6.8812	7.0191	6.2392	5.4593
426.6	6.9732	7.1064	6.3168	5.5272
426.7	7.0654	7.1937	6.3944	5.5951
426.8	7.1574	7.28082	6.47184	5.66286
426.9	7.2496	7.36812	6.54944	5.73076
427	7.3418	7.45542	6.62704	5.79866
427.1	7.434	7.54272	6.70464	5.86656
427.2	7.5296	7.63416	6.78592	5.93768
427.3	7.6592	7.76772	6.90464	6.04156
427.4	7.7894	7.90164	7.02368	6.14572
427.5	7.9202	8.0361	7.1432	6.2503
427.6	8.0512	8.17092	7.26304	6.35516
427.7	8.1828	8.3061	7.3832	6.4603
427.8	8.3146	8.442	7.504	6.566
427.9	8.4472	8.57808	7.62496	6.67184
428	8.58	8.71488	7.74656	6.77824
428.1	8.7134	8.85204	7.86848	6.88492
428.2	8.847	8.98956	7.99072	6.99188
428.3	8.9812	9.12762	8.11344	7.09926
428.4	9.116	9.26622	8.23664	7.20706
428.5	9.251	9.40518	8.36016	7.31514
428.6	9.3866	9.54468	8.48416	7.42364
428.7	9.5226	9.68454	8.60848	7.53242
428.8	9.659	9.82494	8.73328	7.64162
428.9	9.796	9.9657	8.8584	7.7511
429	9.9334	10.107	8.984	7.861
429.1	10.0712	10.2488	9.11008	7.97132
429.2	10.2096	10.3912	9.23664	8.08206
429.3	10.3482	10.5338	9.36336	8.19294
429.4	10.4874	10.6771	9.49072	8.30438
429.5	10.6272	10.8207	9.6184	8.4161
429.6	10.7672	10.9649	9.74656	8.52824
429.7	10.9078	11.1096	9.8752	8.6408
429.8	11.0658	11.2671	10.0152	8.7633
429.9	11.2442	11.4395	10.1685	8.89742
430	11.4224	11.6118	10.3216	9.0314
430.1	11.6004	11.7841	10.4747	9.16538
430.2	11.7784	11.9561	10.6277	9.29922
430.3	11.9562	12.128	10.7805	9.43292
430.4	12.134	12.3001	10.9334	9.56676
430.5	12.3118	12.472	11.0862	9.70046
430.6	12.4894	12.6437	11.2389	9.83402
430.7	12.667	12.8155	11.3915	9.96758
430.8	12.8444	12.987	11.544	10.101
430.9	13.0218	13.1585	11.6965	10.2344
431	13.199	13.3301	11.849	10.3678
431.1	13.3762	13.5014	12.0013	10.5011
431.2	13.5534	13.6728	12.1536	10.6344
431.3	13.7304	13.844	12.3058	10.7675
431.4	13.9074	14.0152	12.4579	10.9007
431.5	14.0844	14.1862	12.6099	11.0337
431.6	14.2612	14.3573	12.7621	11.1668
431.7	14.438	14.5282	12.9139	11.2997
431.8	14.6146	14.699	13.0658	11.4325
431.9	14.7912	14.8698	13.2176	11.5654
432	14.9678	15.0406	13.3694	11.6983
432.1	15.1442	15.2113	13.5211	11.831
432.2	15.3206	15.3819	13.6728	11.9637
432.3	15.4968	15.5525	13.8245	12.0964
432.4	15.7278	15.7738	14.0211	12.2685
432.5	15.9668	16.0025	14.2245	12.4464
432.6	16.2058	16.2313	14.4278	12.6244
432.7	16.4448	16.4603	14.6314	12.8024
432.8	16.6836	16.6891	14.8347	12.9804
432.9	16.9226	16.9178	15.0381	13.1583
433	17.1618	17.1468	15.2416	13.3364
433.1	17.4008	17.3756	15.445	13.5143
433.2	17.6398	17.6045	15.6485	13.6924
433.3	17.8788	17.8333	15.8518	13.8704
433.4	18.118	18.063	16.056	14.049
433.5	18.357	18.2916	16.2592	14.2268
433.6	18.5962	18.5202	16.4624	14.4046
433.7	18.8354	18.7488	16.6656	14.5824
433.8	19.0744	18.9774	16.8688	14.7602
433.9	19.3136	19.2078	17.0736	14.9394
434	19.5528	19.4364	17.2768	15.1172
434.1	19.7922	19.665	17.48	15.295
434.2	20.032	19.8936	17.6832	15.4728
434.3	20.27	20.124	17.888	15.652
434.4	20.51	20.3526	18.0912	15.8298
434.5	20.75	20.5812	18.2944	16.0076
434.6	20.988	20.8116	18.4992	16.1868
434.7	21.228	21.0402	18.7024	16.3646
434.8	21.468	21.2688	18.9056	16.5424
434.9	21.734	21.519	19.128	16.737
435	22.056	21.807	19.384	16.961
435.1	22.378	22.0968	19.6416	17.1864
435.2	22.702	22.3866	19.8992	17.4118
435.3	23.024	22.6746	20.1552	17.6358
435.4	23.348	22.9662	20.4144	17.8626
435.5	23.67	23.256	20.672	18.088
435.6	23.994	23.5458	20.9296	18.3134
435.7	24.318	23.8356	21.1872	18.5388
435.8	24.642	24.1272	21.4464	18.7656
435.9	24.968	24.4188	21.7056	18.9924
436	25.292	24.7086	21.9632	19.2178
436.1	25.618	25.0002	22.2224	19.4446
436.2	25.942	25.2918	22.4816	19.6714
436.3	26.268	25.5852	22.7424	19.8996
436.4	26.594	25.8768	23.0016	20.1264
436.5	26.92	26.1684	23.2608	20.3532
436.6	27.246	26.4618	23.5216	20.5814
436.7	27.574	26.7552	23.7824	20.8096
436.8	27.9	27.0486	24.0432	21.0378
436.9	28.228	27.342	24.304	21.266
437	28.554	27.6354	24.5648	21.4942
437.1	28.882	27.9288	24.8256	21.7224
437.2	29.21	28.224	25.088	21.952
437.3	29.538	28.5174	25.3488	22.1802
437.4	29.868	28.8126	25.6112	22.4098
437.5	30.23	29.1618	25.9216	22.6814
437.6	30.598	29.5236	26.2432	22.9628
437.7	30.966	29.8836	26.5632	23.2428
437.8	31.336	30.2454	26.8848	23.5242
437.9	31.704	30.6072	27.2064	23.8056
438	32.074	30.969	27.528	24.087
438.1	32.444	31.3308	27.8496	24.3684
438.2	32.814	31.6926	28.1712	24.6498
438.3	33.184	32.0544	28.4928	24.9312
438.4	33.554	32.418	28.816	25.214
438.5	33.924	32.7798	29.1376	25.4954
438.6	34.296	33.1434	29.4608	25.7782
438.7	34.666	33.5052	29.7824	26.0596
438.8	35.038	33.8688	30.1056	26.3424
438.9	35.41	34.2324	30.4288	26.6252
439	35.78	34.596	30.752	26.908
439.1	36.152	34.9596	31.0752	27.1908
439.2	36.524	35.325	31.4	27.475
439.3	36.896	35.6886	31.7232	27.7578
439.4	37.268	36.054	32.048	28.042
439.5	37.642	36.4176	32.3712	28.3248
439.6	38.014	36.783	32.696	28.609
439.7	38.388	37.1484	33.0208	28.8932
439.8	38.76	37.5138	33.3456	29.1774
439.9	39.134	37.8792	33.6704	29.4616
440	39.47	38.1996	33.9552	29.7108
440.1	39.748	38.4516	34.1792	29.9068
440.2	40.024	38.7018	34.4016	30.1014
440.3	40.302	38.9502	34.6224	30.2946
440.4	40.578	39.2004	34.8448	30.4892
440.5	40.854	39.4506	35.0672	30.6838
440.6	41.128	39.699	35.288	30.877
440.7	41.404	39.9474	35.5088	31.0702
440.8	41.678	40.1958	35.7296	31.2634
440.9	41.952	40.4442	35.9504	31.4566
441	42.228	40.6926	36.1712	31.6498
441.1	42.5	40.9392	36.3904	31.8416
441.2	42.774	41.1858	36.6096	32.0334
441.3	43.048	41.4342	36.8304	32.2266
441.4	43.32	41.6808	37.0496	32.4184
441.5	43.592	41.9256	37.2672	32.6088
441.6	43.864	42.1722	37.4864	32.8006
441.7	44.136	42.4188	37.7056	32.9924
441.8	44.408	42.6636	37.9232	33.1828
441.9	44.678	42.9084	38.1408	33.3732
442	44.95	43.1532	38.3584	33.5636
442.1	45.22	43.398	38.576	33.754
442.2	45.49	43.6428	38.7936	33.9444
442.3	45.76	43.8876	39.0112	34.1348
442.4	46.03	44.1306	39.2272	34.3238
442.5	46.298	44.3754	39.4448	34.5142
442.6	46.458	44.5806	39.6272	34.6738
442.7	46.618	44.7858	39.8096	34.8334
442.8	46.776	44.991	39.992	34.993
442.9	46.934	45.198	40.176	35.154
443	47.094	45.4032	40.3584	35.3136
443.1	47.252	45.6102	40.5424	35.4746
443.2	47.412	45.8172	40.7264	35.6356
443.3	47.572	46.0242	40.9104	35.7966
443.4	47.732	46.233	41.096	35.959
443.5	47.892	46.44	41.28	36.12
443.6	48.052	46.6488	41.4656	36.2824
443.7	48.212	46.8576	41.6512	36.4448
443.8	48.372	47.0664	41.8368	36.6072
443.9	48.534	47.277	42.024	36.771
444	48.694	47.4858	42.2096	36.9334
444.1	48.856	47.6964	42.3968	37.0972
444.2	49.018	47.907	42.584	37.261
444.3	49.18	48.1176	42.7712	37.4248
444.4	49.342	48.3282	42.9584	37.5886
444.5	49.504	48.5388	43.1456	37.7524
444.6	49.666	48.7512	43.3344	37.9176
444.7	49.83	48.9618	43.5216	38.0814
444.8	49.992	49.1742	43.7104	38.2466
444.9	50.156	49.3884	43.9008	38.4132
445	50.32	49.6008	44.0896	38.5784
445.1	50.282	49.6242	44.1104	38.5966
445.2	50.124	49.536	44.032	38.528
445.3	49.966	49.446	43.952	38.458
445.4	49.808	49.3578	43.8736	38.3894
445.5	49.652	49.2696	43.7952	38.3208
445.6	49.496	49.1832	43.7184	38.2536
445.7	49.34	49.095	43.64	38.185
445.8	49.186	49.0086	43.5632	38.1178
445.9	49.032	48.924	43.488	38.052
446	48.88	48.8376	43.4112	37.9848
446.1	48.728	48.753	43.336	37.919
446.2	48.576	48.6684	43.2608	37.8532
446.3	48.424	48.5856	43.1872	37.7888
446.4	48.274	48.501	43.112	37.723
446.5	48.124	48.4182	43.0384	37.6586
446.6	47.976	48.3354	42.9648	37.5942
446.7	47.828	48.2544	42.8928	37.5312
446.8	47.68	48.1716	42.8192	37.4668
446.9	47.532	48.0906	42.7472	37.4038
447	47.386	48.0114	42.6768	37.3422
447.1	47.24	47.9304	42.6048	37.2792
447.2	47.094	47.8512	42.5344	37.2176
447.3	46.95	47.772	42.464	37.156
447.4	46.806	47.6928	42.3936	37.0944
447.5	46.662	47.6136	42.3232	37.0328
447.6	46.484	47.4984	42.2208	36.9432
447.7	46.226	47.304	42.048	36.792
447.8	45.968	47.1096	41.8752	36.6408
447.9	45.712	46.9152	41.7024	36.4896
448	45.454	46.7226	41.5312	36.3398
448.1	45.2	46.53	41.36	36.19
448.2	44.944	46.3374	41.1888	36.0402
448.3	44.69	46.1448	41.0176	35.8904
448.4	44.436	45.954	40.848	35.742
448.5	44.182	45.7632	40.6784	35.5936
448.6	43.93	45.5724	40.5088	35.4452
448.7	43.676	45.3834	40.3408	35.2982
448.8	43.426	45.1944	40.1728	35.1512
448.9	43.174	45.0054	40.0048	35.0042
449	42.924	44.8164	39.8368	34.8572
449.1	42.674	44.6274	39.6688	34.7102
449.2	42.424	44.4402	39.5024	34.5646
449.3	42.176	44.253	39.336	34.419
449.4	41.928	44.0658	39.1696	34.2734
449.5	41.68	43.8804	39.0048	34.1292
449.6	41.432	43.695	38.84	33.985
449.7	41.186	43.5096	38.6752	33.8408
449.8	40.94	43.3242	38.5104	33.6966
449.9	40.694	43.1406	38.3472	33.5538
450	40.448	42.9552	38.1824	33.4096
450.1	40.2	42.7662	38.0144	33.2626
450.2	39.866	42.4602	37.7424	33.0246
450.3	39.534	42.156	37.472	32.788
450.4	39.202	41.8536	37.2032	32.5528
450.5	38.872	41.5512	36.9344	32.3176
450.6	38.542	41.2506	36.6672	32.0838
450.7	38.214	40.9518	36.4016	31.8514
450.8	37.888	40.653	36.136	31.619
450.9	37.562	40.356	35.872	31.388
451	37.238	40.059	35.608	31.157
451.1	36.914	39.7638	35.3456	30.9274
451.2	36.592	39.4704	35.0848	30.6992
451.3	36.272	39.177	34.824	30.471
451.4	35.952	38.8836	34.5632	30.2428
451.5	35.632	38.5938	34.3056	30.0174
451.6	35.314	38.3022	34.0464	29.7906
451.7	34.998	38.0142	33.7904	29.5666
451.8	34.682	37.7262	33.5344	29.3426
451.9	34.368	37.4382	33.2784	29.1186
452	34.054	37.152	33.024	28.896
452.1	33.742	36.8676	32.7712	28.6748
452.2	33.43	36.5832	32.5184	28.4536
452.3	33.12	36.3006	32.2672	28.2338
452.4	32.81	36.018	32.016	28.014
452.5	32.502	35.7372	31.7664	27.7956
452.6	32.194	35.4564	31.5168	27.5772
452.7	31.936	35.2134	31.3008	27.3882
452.8	31.688	34.9794	31.0928	27.2062
452.9	31.44	34.7454	30.8848	27.0242
453	31.192	34.5114	30.6768	26.8422
453.1	30.944	34.2774	30.4688	26.6602
453.2	30.698	34.0434	30.2608	26.4782
453.3	30.45	33.8112	30.0544	26.2976
453.4	30.202	33.5772	29.8464	26.1156
453.5	29.956	33.3432	29.6384	25.9336
453.6	29.708	33.111	29.432	25.753
453.7	29.462	32.877	29.224	25.571
453.8	29.214	32.6448	29.0176	25.3904
453.9	28.968	32.4108	28.8096	25.2084
454	28.722	32.1786	28.6032	25.0278
454.1	28.474	31.9464	28.3968	24.8472
454.2	28.228	31.7124	28.1888	24.6652
454.3	27.982	31.4802	27.9824	24.4846
454.4	27.736	31.248	27.776	24.304
454.5	27.49	31.0158	27.5696	24.1234
454.6	27.244	30.7836	27.3632	23.9428
454.7	26.998	30.5514	27.1568	23.7622
454.8	26.752	30.321	26.952	23.583
454.9	26.508	30.0888	26.7456	23.4024
455	26.262	29.8566	26.5392	23.2218
455.1	26.016	29.6244	26.3328	23.0412
455.2	25.79	29.394	26.128	22.862
455.3	25.574	29.1654	25.9248	22.6842
455.4	25.358	28.9368	25.7216	22.5064
455.5	25.144	28.71	25.52	22.33
455.6	24.928	28.4832	25.3184	22.1536
455.7	24.716	28.2564	25.1168	21.9772
455.8	24.502	28.0314	24.9168	21.8022
455.9	24.29	27.8064	24.7168	21.6272
456	24.078	27.5814	24.5168	21.4522
456.1	23.868	27.3582	24.3184	21.2786
456.2	23.658	27.135	24.12	21.105
456.3	23.448	26.9136	23.9232	20.9328
456.4	23.24	26.6922	23.7264	20.7606
456.5	23.03	26.4708	23.5296	20.5884
456.6	22.824	26.2512	23.3344	20.4176
456.7	22.616	26.0316	23.1392	20.2468
456.8	22.41	25.8138	22.9456	20.0774
456.9	22.204	25.5942	22.7504	19.9066
457	21.998	25.3782	22.5584	19.7386
457.1	21.794	25.1604	22.3648	19.5692
457.2	21.59	24.9444	22.1728	19.4012
457.3	21.386	24.7284	21.9808	19.2332
457.4	21.184	24.5142	21.7904	19.0666
457.5	20.98	24.3	21.6	18.9
457.6	20.778	24.0858	21.4096	18.7334
457.7	20.604	23.904	21.248	18.592
457.8	20.452	23.7492	21.1104	18.4716
457.9	20.3	23.5944	20.9728	18.3512
458	20.148	23.4396	20.8352	18.2308
458.1	19.9964	23.2848	20.6976	18.1104
458.2	19.845	23.1318	20.5616	17.9914
458.3	19.6938	22.977	20.424	17.871
458.4	19.5428	22.824	20.288	17.752
458.5	19.392	22.671	20.152	17.633
458.6	19.2414	22.518	20.016	17.514
458.7	19.091	22.3632	19.8784	17.3936
458.8	18.941	22.212	19.744	17.276
458.9	18.791	22.059	19.608	17.157
459	18.641	21.906	19.472	17.038
459.1	18.4914	21.753	19.336	16.919
459.2	18.342	21.6018	19.2016	16.8014
459.3	18.1928	21.4506	19.0672	16.6838
459.4	18.0438	21.2976	18.9312	16.5648
459.5	17.8948	21.1464	18.7968	16.4472
459.6	17.746	20.9952	18.6624	16.3296
459.7	17.5976	20.844	18.528	16.212
459.8	17.4492	20.6928	18.3936	16.0944
459.9	17.301	20.5434	18.2608	15.9782
460	17.153	20.3922	18.1264	15.8606
460.1	17.0052	20.241	17.992	15.743
460.2	16.858	20.0916	17.8592	15.6268
460.3	16.7116	19.9404	17.7248	15.5092
460.4	16.566	19.7892	17.5904	15.3916
460.5	16.4208	19.6398	17.4576	15.2754
460.6	16.2762	19.4904	17.3248	15.1592
460.7	16.132	19.3428	17.1936	15.0444
460.8	15.9886	19.1952	17.0624	14.9296
460.9	15.8456	19.0476	16.9312	14.8148
461	15.7032	18.9	16.8	14.7
461.1	15.5614	18.7542	16.6704	14.5866
461.2	15.42	18.6084	16.5408	14.4732
461.3	15.2792	18.4644	16.4128	14.3612
461.4	15.139	18.3204	16.2848	14.2492
461.5	14.9992	18.1764	16.1568	14.1372
461.6	14.86	18.0324	16.0288	14.0252
461.7	14.7212	17.8893	15.9016	13.9139
461.8	14.583	17.7471	15.7752	13.8033
461.9	14.4454	17.6053	15.6491	13.693
462	14.308	17.464	15.5235	13.5831
462.1	14.1714	17.3232	15.3984	13.4736
462.2	14.035	17.183	15.2738	13.3645
462.3	13.8994	17.0433	15.1496	13.2559
462.4	13.764	16.9042	15.0259	13.1477
462.5	13.6292	16.7654	14.9026	13.0397
462.6	13.4948	16.6271	14.7797	12.9322
462.7	13.3614	16.4896	14.6574	12.8253
462.8	13.2286	16.3526	14.5357	12.7187
462.9	13.0964	16.2162	14.4144	12.6126
463	12.9644	16.0799	14.2933	12.5066
463.1	12.8328	15.9442	14.1726	12.4011
463.2	12.7016	15.8087	14.0522	12.2956
463.3	12.5706	15.6737	13.9322	12.1906
463.4	12.44	15.539	13.8125	12.0859
463.5	12.3098	15.4048	13.6931	11.9815
463.6	12.18	15.2707	13.5739	11.8772
463.7	12.0504	15.1371	13.4552	11.7733
463.8	11.9212	15.0039	13.3368	11.6697
463.9	11.7924	14.8711	13.2187	11.5664
464	11.6638	14.7384	13.1008	11.4632
464.1	11.5356	14.6063	12.9834	11.3604
464.2	11.4076	14.4743	12.8661	11.2578
464.3	11.28	14.3429	12.7493	11.1556
464.4	11.1528	14.2117	12.6326	11.0536
464.5	11.0258	14.0809	12.5163	10.9518
464.6	10.8992	13.9504	12.4003	10.8503
464.7	10.773	13.8202	12.2846	10.7491
464.8	10.647	13.6903	12.1691	10.648
464.9	10.5212	13.5608	12.0541	10.5473
465	10.3958	13.4316	11.9392	10.4468
465.1	10.2708	13.3027	11.8246	10.3466
465.2	10.1592	13.1882	11.7229	10.2575
465.3	10.0642	13.0912	11.6366	10.1821
465.4	9.969	12.9942	11.5504	10.1066
465.5	9.8742	12.8972	11.4642	10.0311
465.6	9.7794	12.8005	11.3782	9.95596
465.7	9.6846	12.7039	11.2923	9.88078
465.8	9.59	12.6074	11.2066	9.80574
465.9	9.4956	12.5109	11.1208	9.7307
466	9.4012	12.4148	11.0354	9.65594
466.1	9.307	12.3187	10.9499	9.58118
466.2	9.2128	12.2225	10.8645	9.50642
466.3	9.1188	12.1266	10.7792	9.4318
466.4	9.025	12.0308	10.6941	9.35732
466.5	8.9312	11.9353	10.6091	9.28298
466.6	8.8376	11.8397	10.5242	9.20864
466.7	8.744	11.7443	10.4394	9.13444
466.8	8.6504	11.6489	10.3546	9.06024
466.9	8.5572	11.5538	10.2701	8.98632
467	8.4638	11.4586	10.1854	8.91226
467.1	8.3708	11.3638	10.1011	8.83848
467.2	8.2778	11.2689	10.0168	8.7647
467.3	8.1848	11.174	9.93248	8.69092
467.4	8.092	11.0795	9.84848	8.61742
467.5	7.9992	10.985	9.76448	8.54392
467.6	7.9066	10.8905	9.68048	8.47042
467.7	7.8184	10.8025	9.60224	8.40196
467.8	7.7346	10.7203	9.52912	8.33798
467.9	7.6508	10.6384	9.45632	8.27428
468	7.5674	10.5568	9.38384	8.21086
468.1	7.4844	10.4755	9.31152	8.14758
468.2	7.4016	10.3945	9.23952	8.08458
468.3	7.319	10.3138	9.16784	8.02186
468.4	7.2368	10.2334	9.09632	7.95928
468.5	7.1548	10.1533	9.02512	7.89698
468.6	7.0732	10.0733	8.95408	7.83482
468.7	6.9916	9.99378	8.88336	7.77294
468.8	6.9106	9.91458	8.81296	7.71134
468.9	6.8296	9.83538	8.74256	7.64974
469	6.749	9.75672	8.67264	7.58856
469.1	6.6686	9.67824	8.60288	7.52752
469.2	6.5884	9.59994	8.53328	7.46662
469.3	6.5086	9.522	8.464	7.406
469.4	6.429	9.44424	8.39488	7.34552
469.5	6.3496	9.36684	8.32608	7.28532
469.6	6.2706	9.28962	8.25744	7.22526
469.7	6.1918	9.21276	8.18912	7.16548
469.8	6.1132	9.13608	8.12096	7.10584
469.9	6.0348	9.05958	8.05296	7.04634
470	5.9566	8.98344	7.98528	6.98712
470.1	5.8788	8.90748	7.91776	6.92804
470.2	5.8164	8.84898	7.86576	6.88254
470.3	5.763	8.8002	7.8224	6.8446
470.4	5.7098	8.7516	7.7792	6.8068
470.5	5.6566	8.70318	7.73616	6.76914
470.6	5.6036	8.65494	7.69328	6.73162
470.7	5.5508	8.6067	7.6504	6.6941
470.8	5.498	8.55882	7.60784	6.65686
470.9	5.4454	8.51094	7.56528	6.61962
471	5.393	8.46324	7.52288	6.58252
471.1	5.3408	8.41572	7.48064	6.54556
471.2	5.2888	8.36838	7.43856	6.50874
471.3	5.2368	8.32104	7.39648	6.47192
471.4	5.185	8.27388	7.35456	6.43524
471.5	5.1332	8.2269	7.3128	6.3987
471.6	5.0816	8.1801	7.2712	6.3623
471.7	5.0302	8.13348	7.22976	6.32604
471.8	4.979	8.08686	7.18832	6.28978
471.9	4.9278	8.04042	7.14704	6.25366
472	4.8768	7.99416	7.10592	6.21768
472.1	4.826	7.94808	7.06496	6.18184
472.2	4.7752	7.902	7.024	6.146
472.3	4.7246	7.8561	6.9832	6.1103
472.4	4.6742	7.81038	6.94256	6.07474
472.5	4.6238	7.76466	6.90192	6.03918
472.6	4.5736	7.7193	6.8616	6.0039
472.7	4.5344	7.69914	6.84368	5.98822
472.8	4.4976	7.6851	6.8312	5.9773
472.9	4.461	7.67106	6.81872	5.96638
473	4.4244	7.65702	6.80624	5.95546
473.1	4.3876	7.64298	6.79376	5.94454
473.2	4.351	7.62894	6.78128	5.93362
473.3	4.3144	7.6149	6.7688	5.9227
473.4	4.2778	7.60086	6.75632	5.91178
473.5	4.2412	7.587	6.744	5.901
473.6	4.2044	7.57296	6.73152	5.89008
473.7	4.1678	7.55892	6.71904	5.87916
473.8	4.1312	7.54506	6.70672	5.86838
473.9	4.0946	7.53102	6.69424	5.85746
474	4.058	7.51698	6.68176	5.84654
474.1	4.0216	7.50312	6.66944	5.83576
474.2	3.985	7.48926	6.65712	5.82498
474.3	3.9484	7.47522	6.64464	5.81406
474.4	3.9118	7.46136	6.63232	5.80328
474.5	3.8752	7.4475	6.62	5.7925
474.6	3.8388	7.43346	6.60752	5.78158
474.7	3.8022	7.4196	6.5952	5.7708
474.8	3.7656	7.40574	6.58288	5.76002
474.9	3.7292	7.39188	6.57056	5.74924
475	3.6926	7.37988	6.55824	5.73846
475.1	3.6562	7.36788	7.2848	6.3742
475.2	3.6264	7.35588	7.27584	6.36636
475.3	3.5964	7.34388	7.26688	6.35852
475.4	3.5666	7.33188	7.25808	6.35082
475.5	3.5366	7.31988	7.24912	6.34298
475.6	3.5068	7.30788	7.24032	6.33528
475.7	3.477	7.29588	7.23136	6.32744
475.8	3.4472	7.28288	7.22256	6.31974
475.9	3.4174	7.26988	7.21376	6.31204
476	3.3876	7.25688	7.20496	6.30434
476.1	3.3578	7.24388	7.19616	6.29664
476.2	3.328	7.23088	7.18736	6.28894
476.3	3.2984	7.21788	7.17856	6.28124
476.4	3.2686	7.20488	7.16976	6.27354
476.5	3.2388	7.19188	7.16096	6.26584
476.6	3.2092	7.17688	7.15232	6.25828
476.7	3.1796	7.16188	7.14352	6.25058
476.8	3.15	7.14688	7.13472	6.24288
476.9	3.1202	7.13188	7.12608	6.23532
477	3.0906	7.11688	7.11744	6.22776
477.1	3.061	7.10188	7.10864	6.22006
477.2	3.0314	7.08688	7.1	6.2125
477.3	3.002	7.07188	7.09136	6.20494
477.4	2.9724	7.05388	7.08272	6.19738
477.5	2.9428	7.03588	7.07408	6.18982
477.6	2.9156	7.01788	7.0696	6.1859
477.7	2.894	6.99988	7.07568	6.19122
477.8	2.8726	6.98188	7.08176	6.19654
477.9	2.851	6.96388	7.08768	6.20172
478	2.8296	6.94588	7.09376	6.20704
478.1	2.808	6.92788	7.09984	6.21236
478.2	2.7864	6.90988	7.10576	6.21754
478.3	2.7648	6.89188	7.11184	6.22286
478.4	2.7434	6.87388	7.11792	6.22818
478.5	2.7218	6.85588	7.124	6.2335
478.6	2.7002	6.83788	7.13008	6.23882
478.7	2.6786	6.81888	7.136	6.244
478.8	2.6572	6.79988	7.14208	6.24932
478.9	2.6356	6.78088	7.14816	6.25464
479	2.614	6.76188	7.15424	6.25996
479.1	2.5924	6.74288	7.16032	6.26528
479.2	2.5708	6.72388	7.1664	6.2706
479.3	2.5492	6.70488	7.17248	6.27592
479.4	2.5276	6.68588	7.17856	6.28124
479.5	2.506	6.66688	7.18464	6.28656
479.6	2.4844	6.64788	7.19072	6.29188
479.7	2.4628	6.62888	7.1968	6.2972
479.8	2.4412	6.60988	7.20304	6.30266
479.9	2.4196	6.59088	7.20912	6.30798
480	2.398	6.57188	7.2152	6.3133
480.1	2.3756	6.55288	7.22608	6.32282
480.2	2.3526	6.53188	7.24016	6.33514
480.3	2.3296	6.51088	7.25424	6.34746
480.4	2.3068	6.48988	7.26832	6.35978
480.5	2.2838	6.46888	7.2824	6.3721
480.6	2.261	6.44788	7.29648	6.38442
480.7	2.2382	6.42688	7.31056	6.39674
480.8	2.2152	6.40588	7.32464	6.40906
480.9	2.1924	6.38488	7.33872	6.42138
481	2.1696	6.36388	7.3528	6.4337
481.1	2.1466	6.34288	7.36688	6.44602
481.2	2.1238	6.32188	7.38096	6.45834
481.3	2.101	6.30088	7.39504	6.47066
481.4	2.0782	6.29998	7.40912	6.48298
481.5	2.0554	6.27498	7.4232	6.4953
481.6	2.0326	6.24998	7.43728	6.50762
481.7	2.0098	6.22498	7.45136	6.51994
481.8	1.98712	6.19998	7.4656	6.5324
481.9	1.96436	6.17498	7.47968	6.54472
482	1.94162	6.14998	7.49376	6.55704
482.1	1.91888	6.12498	7.50784	6.56936
482.2	1.89614	6.09998	7.52192	6.58168
482.3	1.87342	6.07498	7.53616	6.59414
482.4	1.8507	6.04998	7.55024	6.60646
482.5	1.82802	6.02498	7.56432	6.61878
482.6	1.81964	5.99998	7.60736	6.65644
482.7	1.81174	5.97498	7.65152	6.69508
482.8	1.80384	5.94998	7.69552	6.73358
482.9	1.79594	5.92498	7.73968	6.77222
483	1.78804	5.89998	7.78368	6.81072
483.1	1.78014	5.87498	7.82784	6.84936
483.2	1.77224	5.84698	7.872	6.888
483.3	1.76432	5.81898	7.91616	6.92664
483.4	1.7564	5.79098	7.96048	6.96542
483.5	1.7485	5.76298	8.00464	7.00406
483.6	1.74058	5.73498	8.0488	7.0427
483.7	1.73264	5.70698	8.09312	7.08148
483.8	1.72472	5.67898	8.13744	7.12026
483.9	1.7168	5.65098	8.1816	7.1589
484	1.70886	5.62298	8.22592	7.19768
484.1	1.70092	5.59498	8.27024	7.23646
484.2	1.69298	5.56698	8.31472	7.27538
484.3	1.68504	5.53898	8.12976	7.31416
484.4	1.6771	5.51098	8.1096	7.35294
484.5	1.66916	5.48298	8.08944	7.39186
484.6	1.6612	5.45498	8.06912	7.43078
484.7	1.65324	5.42698	8.04896	7.46956
484.8	1.64528	5.39898	8.0288	7.50848
484.9	1.63732	5.37098	8.00848	7.5474
485	1.62704	5.34098	8.00128	7.5908
485.1	1.613	5.31098	8.0152	7.64148
485.2	1.59896	5.28098	8.02928	7.69216
485.3	1.58488	5.30198	8.0432	7.74284
485.4	1.57078	5.32298	8.05712	7.79352
485.5	1.55668	5.34398	8.0712	7.84434
485.6	1.54256	5.36498	8.08512	7.8953
485.7	1.52842	5.38598	8.0992	7.94612
485.8	1.51426	5.40698	8.11328	7.99722
485.9	1.50008	5.42798	8.12736	8.04818
486	1.48588	5.44898	8.14128	8.09928
486.1	1.47166	5.46998	8.15536	8.15038
486.2	1.45744	5.49098	8.16944	8.20162
486.3	1.4432	5.51198	8.18352	8.25286
486.4	1.42892	5.53298	8.1976	8.3041
486.5	1.41464	5.55398	8.21168	8.35548
486.6	1.40034	5.57498	8.22592	8.40686
486.7	1.38602	5.59598	8.24	8.45838
486.8	1.37168	5.61698	8.25408	8.5099
486.9	1.35732	5.63798	8.26832	8.56142
487	1.34296	5.67198	8.2824	8.61308
487.1	1.32858	5.70598	8.29648	8.66474
487.2	1.31416	5.73998	8.31072	8.7164
487.3	1.29974	5.77398	8.32496	8.7682
487.4	1.2853	5.80798	8.33904	8.82014
487.5	1.27766	5.84198	8.3576	8.88846
487.6	1.27124	5.87598	8.37696	8.96
487.7	1.26482	5.90998	8.39632	9.03154
487.8	1.2584	5.94398	8.41568	9.10308
487.9	1.25196	5.97798	8.43504	9.17476
488	1.24554	6.01198	8.4544	9.2463
488.1	1.2391	6.04598	8.47392	9.31812
488.2	1.23266	6.07998	8.49328	9.3898
488.3	1.22622	6.11398	8.51264	9.46162
488.4	1.21976	6.14798	8.53216	9.53344
488.5	1.21332	6.18198	8.55152	9.60526
488.6	1.20686	6.21598	8.57104	9.67708
488.7	1.2004	6.24098	8.5904	9.74904
488.8	1.19394	6.26598	8.60992	9.821
488.9	1.18746	6.29098	8.62944	9.8931
489	1.181	6.31598	8.64896	9.96506
489.1	1.17452	6.34098	8.66832	10.0372
489.2	1.16804	6.36598	8.68784	10.1094
489.3	1.16156	6.39098	8.70736	10.1815
489.4	1.15506	6.41598	8.72688	10.2537
489.5	1.14858	6.44098	8.74656	10.326
489.6	1.14208	6.46598	8.76608	10.3984
489.7	1.13558	6.49098	8.7856	10.4707
489.8	1.12908	6.51598	8.80512	10.5431
489.9	1.12402	6.6753	8.83424	10.6208
490	1.12148	6.67044	8.87984	10.7076
490.1	1.11894	6.66576	8.9256	10.7944
490.2	1.1164	6.6609	8.9712	10.8812
490.3	1.11388	6.65622	9.0168	10.968
490.4	1.11134	6.65136	9.0624	11.0548
490.5	1.1088	6.64668	9.108	11.1416
490.6	1.10628	6.64182	9.15376	11.2284
490.7	1.10374	6.63714	9.19936	11.3152
490.8	1.10122	6.63228	9.24496	11.402
490.9	1.0987	6.6276	9.29056	11.4888
491	1.09616	6.62292	9.33616	11.5755
491.1	1.09364	6.61806	9.38176	11.6623
491.2	1.09112	6.61338	9.42752	11.7491
491.3	1.0886	6.6087	9.47312	11.8357
491.4	1.08608	6.60402	9.51872	11.9225
491.5	1.08356	6.59916	9.56432	12.0092
491.6	1.08104	6.59448	9.60992	12.096
491.7	1.07852	6.5898	9.65552	12.1827
491.8	1.076	6.58512	9.70112	12.2693
491.9	1.0735	6.58044	9.74672	12.3561
492	1.07098	6.57576	9.79232	12.4428
492.1	1.06846	6.57108	9.83792	12.5294
492.2	1.06596	6.5664	9.88352	12.6161
492.3	1.06344	6.56172	9.92912	12.7028
492.4	1.05732	6.57432	9.98544	12.8213
492.5	1.05092	6.58818	10.0426	12.9423
492.6	1.0445	6.60222	10.0997	13.0635
492.7	1.03808	6.61608	10.157	13.1849
492.8	1.03166	6.63012	10.2142	13.3063
492.9	1.02522	6.64398	10.2717	13.4281
493	1.01876	6.65802	10.3291	13.5499
493.1	1.0123	6.67188	10.3867	13.6718
493.2	1.00584	6.68592	10.4443	13.7939
493.3	0.99936	6.69996	10.5019	13.9161
493.4	0.99286	6.714	10.5597	14.0392
493.5	0.98636	6.72804	10.6174	14.161
493.6	0.97986	6.74208	10.6754	14.2842
493.7	0.97334	6.75612	10.7333	14.4074
493.8	0.96682	6.77016	10.7914	14.5306
493.9	0.96026	6.7842	10.8494	14.6538
494	0.95372	6.79842	10.9075	14.777
494.1	0.94716	6.81246	10.9658	14.9002
494.2	0.9406	6.82668	11.024	15.0234
494.3	0.93402	6.84072	11.0824	15.148
494.4	0.92742	6.85494	11.1408	15.2712
494.5	0.92082	6.86898	11.1994	15.3958
494.6	0.91422	6.8832	11.2579	15.5204
494.7	0.9076	6.89742	11.3166	15.645
494.8	0.9017	6.91632	11.3907	15.7822
494.9	0.89642	6.93918	11.4778	15.9306
495	0.8911	6.96204	11.565	16.079
495.1	0.8858	6.9849	11.6522	16.2274
495.2	0.88048	7.00794	11.7395	16.3758
495.3	0.87514	7.0308	11.827	16.5256
495.4	0.8698	7.05384	11.9147	16.674
495.5	0.86446	7.07688	12.0024	16.8238
495.6	0.8591	7.09992	12.0901	16.9736
495.7	0.85374	7.12296	12.1781	17.1234
495.8	0.84838	7.146	12.2661	17.2732
495.9	0.84298	7.16904	12.3542	17.423
496	0.8376	7.19226	12.4426	17.5742
496.1	0.8322	7.2153	12.5309	17.724
496.2	0.8268	7.23852	12.6194	17.8752
496.3	0.82138	7.26174	12.708	18.0264
496.4	0.81596	7.28496	12.7968	18.1776
496.5	0.81054	7.30818	12.8856	18.3288
496.6	0.8051	7.3314	12.9746	18.48
496.7	0.79964	7.3548	13.0635	18.6326
496.8	0.79418	7.37802	13.1526	18.7838
496.9	0.78872	7.40142	13.2419	18.9364
497	0.78326	7.42482	13.3314	19.089
497.1	0.77776	7.44822	13.4208	19.2416
497.2	0.77568	7.47468	13.5157	19.4026
497.3	0.78576	7.51194	13.6296	19.5958
497.4	0.79586	7.5492	13.7437	19.7904
497.5	0.80596	7.58664	13.8581	19.9836
497.6	0.81612	7.62408	13.9726	20.1782
497.7	0.82628	7.6617	14.0877	20.3742
497.8	0.83648	7.69932	14.2027	20.5688
497.9	0.8467	7.73694	14.3182	20.7648
498	0.85694	7.77474	14.4339	20.9622
498.1	0.8672	7.81254	14.5501	21.1596
498.2	0.8775	7.85052	14.6662	21.357
498.3	0.88782	7.88868	14.7829	21.5544
498.4	0.89818	7.92684	14.8997	21.7532
498.5	0.90854	7.965	15.0168	21.952
498.6	0.91894	8.00316	15.1342	22.1508
498.7	0.92936	8.04168	15.2518	22.351
498.8	0.9398	8.08002	15.3698	22.5512
498.9	0.95028	8.11854	15.488	22.7528
499	0.96078	8.15724	15.6064	22.953
499.1	0.9713	8.19594	15.7253	23.1546
499.2	0.98184	8.23482	15.8443	23.3576
499.3	0.99242	8.27352	15.9635	23.5606
499.4	1.00302	8.31258	16.0832	23.7636
499.5	1.01364	8.35164	16.2032	23.9666
499.6	1.0243	8.3907	16.3232	24.171
499.7	1.02062	8.4456	16.4576	24.3936
499.8	1.01604	8.50158	16.592	24.6176
499.9	1.01146	8.55756	16.7264	24.843
500	1.00686	8.61354	16.8624	25.067
500.1	1.00228	8.6697	16.9968	25.291
500.2	0.99768	8.72568	17.1312	25.5164
500.3	0.99308	8.78184	17.2672	25.7404
500.4	0.98848	8.838	17.4016	25.9658
500.5	0.98388	8.89416	17.5376	26.1912
500.6	0.97928	8.95032	17.672	26.4166
500.7	0.97468	9.00648	17.808	26.6406
500.8	0.97008	9.06282	17.944	26.866
500.9	0.96546	9.11916	18.08	27.0928
501	0.96084	9.17532	18.2144	27.3182
501.1	0.95622	9.23166	18.3504	27.5436
501.2	0.95162	9.288	18.4864	27.769
501.3	0.947	9.34452	18.6224	27.9958
501.4	0.94236	9.40086	18.7584	28.2212
501.5	0.93774	9.45738	18.8944	28.448
501.6	0.93312	9.51372	19.0304	28.6734
501.7	0.92848	9.57024	19.1664	28.9002
501.8	0.92384	9.62676	19.3024	29.127
501.9	0.9192	9.68346	19.4384	29.3538
502	0.91456	9.73998	19.5744	29.5806
502.1	0.9125	9.80766	19.728	29.8326
502.2	0.91148	9.88002	19.8864	30.0958
502.3	0.91044	9.95256	20.0464	30.359
502.4	0.9094	10.0251	20.2064	30.6236
502.5	0.90836	10.0978	20.3664	30.8882
502.6	0.9073	10.1707	20.5264	31.1542
502.7	0.90626	10.2436	20.688	31.4202
502.8	0.9052	10.3169	20.848	31.6862
502.9	0.90414	10.3901	21.0096	31.9522
503	0.90308	10.4636	21.1712	32.2196
503.1	0.90202	10.537	21.3328	32.4884
503.2	0.90094	10.6108	21.496	32.7558
503.3	0.89988	10.6846	21.6576	33.0246
503.4	0.8988	10.7586	21.8208	33.2948
503.5	0.89772	10.8328	21.984	33.5636
503.6	0.89662	10.9069	22.1488	33.8352
503.7	0.89554	10.9813	22.312	34.1054
503.8	0.89444	11.0558	22.4752	34.377
503.9	0.89334	11.1305	22.64	34.6486
504	0.89224	11.2054	22.8048	34.9216
504.1	0.89114	11.2802	22.9696	35.1946
504.2	0.89004	11.3555	23.136	35.4676
504.3	0.88892	11.4305	23.3008	35.742
504.4	0.8878	11.506	23.4672	36.0164
504.5	0.88656	11.59	23.6464	36.316
504.6	0.8852	11.6816	23.8384	36.6352
504.7	0.88384	11.7734	24.0304	36.9558
504.8	0.88248	11.8654	24.2224	37.2764
504.9	0.8811	11.9576	24.416	37.5998
505	0.87972	12.0501	24.6096	37.9218
505.1	0.87834	12.1428	24.8032	38.2466
505.2	0.87694	12.2357	24.9984	38.57
505.3	0.87554	12.3289	25.1936	38.8962
505.4	0.87414	12.4223	25.3888	39.2224
505.5	0.87272	12.5159	25.584	39.55
505.6	0.8713	12.6097	25.7808	39.8776
505.7	0.86988	12.7039	25.9776	40.2066
505.8	0.86846	12.7982	26.1744	40.5356
505.9	0.86702	12.8927	26.3728	40.866
506	0.86558	12.9875	26.5712	41.1978
506.1	0.86414	13.0826	26.7696	41.5296
506.2	0.86268	13.1778	26.9696	41.8628
506.3	0.86122	13.2734	27.1696	42.196
506.4	0.85976	13.3691	27.3696	42.5306
506.5	0.85828	13.4651	27.5712	42.8666
506.6	0.8568	13.5614	27.7728	43.2026
506.7	0.85532	13.6579	27.9744	43.54
506.8	0.85382	13.7545	28.176	43.8774
506.9	0.85516	13.8472	28.3808	44.2008
507	0.86046	13.9336	28.5888	44.5004
507.1	0.86576	14.0202	28.7952	44.8
507.2	0.87106	14.1068	29.0016	45.0996
507.3	0.87636	14.1935	29.2096	45.3992
507.4	0.88166	14.2801	29.416	45.6988
507.5	0.88696	14.3667	29.624	45.9998
507.6	0.89226	14.4535	29.832	46.2994
507.7	0.89756	14.54	30.0384	46.599
507.8	0.90286	14.6266	30.2464	46.9
507.9	0.90818	14.7134	30.4528	47.1996
508	0.91348	14.8001	30.6608	47.5006
508.1	0.91878	14.8869	30.8672	47.8002
508.2	0.9241	14.9735	31.0752	48.1012
508.3	0.9294	15.0602	31.2832	48.4008
508.4	0.9347	15.147	31.4912	48.7018
508.5	0.94002	15.2338	31.6976	49.0014
508.6	0.94532	15.3205	31.9056	49.3024
508.7	0.95064	15.4075	32.1136	49.6034
508.8	0.95594	15.4942	32.32	49.903
508.9	0.96126	15.581	32.528	50.204
509	0.96658	15.6679	32.736	50.505
509.1	0.97188	15.7547	32.944	50.806
509.2	0.9772	15.8416	33.152	51.1056
509.3	0.98196	15.9361	33.3632	51.4206
509.4	0.9857	16.0452	33.5824	51.7636
509.5	0.98942	16.1545	33.8016	52.1066
509.6	0.99316	16.2639	34.0224	52.4496
509.7	0.9969	16.3735	34.2432	52.794
509.8	1.00066	16.4833	34.464	53.1398
509.9	1.00442	16.5935	34.6848	53.4856
510	1.00818	16.7036	34.9056	53.8314
510.1	1.01194	16.8142	35.128	54.1786
510.2	1.01572	16.9249	35.3504	54.5258
510.3	1.0195	17.0356	35.5728	54.873
510.4	1.0233	17.1468	35.7968	55.223
510.5	1.02708	17.258	36.0208	55.5716
510.6	1.03088	17.3695	36.2448	55.9216
510.7	1.0347	17.4812	36.4688	56.273
510.8	1.0385	17.593	36.6944	56.623
510.9	1.04232	17.7052	36.92	56.9758
511	1.04616	17.8175	37.1456	57.3286
511.1	1.04998	17.93	37.3712	57.6814
511.2	1.05382	18.0432	37.5984	58.0356
511.3	1.05766	18.1548	37.824	58.3898
511.4	1.06152	18.2682	38.0528	58.7454
511.5	1.06538	18.3816	38.28	59.101
511.6	1.06924	18.495	38.5072	59.4566
511.7	1.07236	18.603	38.72	59.7926
511.8	1.074	18.6966	38.9008	60.0852
511.9	1.07564	18.792	39.0816	60.3792
512	1.07728	18.8856	39.2624	60.6718
512.1	1.07892	18.981	39.4432	60.9658
512.2	1.08054	19.0746	39.624	61.2584
512.3	1.08218	19.17	39.8048	61.5524
512.4	1.08384	19.2654	39.9856	61.8464
512.5	1.08548	19.359	40.168	62.1404
512.6	1.08712	19.4544	40.3488	62.4344
512.7	1.08876	19.5498	40.5296	62.7298
512.8	1.0904	19.6452	40.712	63.0238
512.9	1.09204	19.7388	40.8928	63.3192
513	1.09368	19.8342	41.0752	63.6146
513.1	1.09534	19.9296	41.2576	63.91
513.2	1.09698	20.025	41.4384	64.2054
513.3	1.09862	20.1204	41.6208	64.5008
513.4	1.10028	20.2158	41.8032	64.7962
513.5	1.10192	20.3112	41.9856	65.0916
513.6	1.10358	20.4066	42.168	65.3884
513.7	1.10522	20.502	42.3504	65.6838
513.8	1.10688	20.5974	42.5328	65.9806
513.9	1.10852	20.6928	42.7152	66.2774
514	1.11018	20.7882	42.8992	66.5742
514.1	1.11242	20.8818	43.0704	66.8416
514.2	1.1157	20.9682	43.2256	67.0572
514.3	1.11896	21.0564	43.3808	67.2728
514.4	1.12224	21.1428	43.536	67.4898
514.5	1.1255	21.231	43.6912	67.7054
514.6	1.12878	21.3174	43.848	67.9224
514.7	1.13206	21.4056	44.0032	68.1394
514.8	1.13536	21.492	44.1584	68.3564
514.9	1.13864	21.5802	44.3152	68.5734
515	1.14194	21.6684	44.4704	68.7918
515.1	1.14522	21.7566	44.6272	69.0088
515.2	1.14852	21.843	44.784	69.2272
515.3	1.15182	21.9312	44.9408	69.4456
515.4	1.15512	22.0194	45.0976	69.664
515.5	1.15844	22.1076	45.2544	69.8824
515.6	1.16174	22.1958	45.4112	70.1008
515.7	1.16506	22.284	45.568	70.3206
515.8	1.16836	22.3722	45.7264	70.539
515.9	1.17168	22.4622	45.8832	70.7588
516	1.175	22.5504	46.0416	70.9786
516.1	1.17834	22.6386	46.1984	71.1984
516.2	1.18166	22.7268	46.3568	71.4182
516.3	1.185	22.8168	46.5152	71.638
516.4	1.18832	22.905	46.6736	71.8592
516.5	1.18956	22.9788	46.8032	72.0454
516.6	1.1883	23.0328	46.9008	72.1938
516.7	1.18704	23.085	46.9968	72.3408
516.8	1.18578	23.139	47.0944	72.4892
516.9	1.18452	23.193	47.192	72.6376
517	1.18326	23.247	47.2896	72.786
517.1	1.182	23.301	47.3872	72.933
517.2	1.18074	23.355	47.4832	73.0814
517.3	1.17948	23.409	47.5808	73.2298
517.4	1.17822	23.463	47.6784	73.3796
517.5	1.17694	23.517	47.776	73.528
517.6	1.17568	23.571	47.8736	73.6764
517.7	1.17442	23.625	47.9712	73.8248
517.8	1.17314	23.679	48.0688	73.9732
517.9	1.17186	23.733	48.168	74.123
518	1.1706	23.787	48.2656	74.2714
518.1	1.16932	23.841	48.3632	74.4212
518.2	1.16804	23.895	48.4608	74.5696
518.3	1.16676	23.949	48.5584	74.7194
518.4	1.16548	24.003	48.6576	74.8678
518.5	1.1642	24.057	48.7552	75.0176
518.6	1.16292	24.111	48.8528	75.1674
518.7	1.16162	24.1668	48.952	75.3172
518.8	1.16034	24.2208	49.0496	75.467
518.9	1.16208	24.2568	49.1184	75.5692
519	1.1658	24.2838	49.1664	75.642
519.1	1.16954	24.309	49.2144	75.7148
519.2	1.17326	24.3342	49.2624	75.7876
519.3	1.17698	24.3612	49.3104	75.8604
519.4	1.18072	24.3864	49.3584	75.9332
519.5	1.18444	24.4116	49.4064	76.006
519.6	1.18816	24.4386	49.456	76.0788
519.7	1.1919	24.4638	49.504	76.1516
519.8	1.19562	24.489	49.552	76.2244
519.9	1.19934	24.516	49.6	76.2972
520	1.20306	24.5412	49.648	76.37
520.1	1.2068	24.5664	49.696	76.4428
520.2	1.21052	24.5934	49.7456	76.5156
520.3	1.21424	24.6186	49.7936	76.5884
520.4	1.21798	24.6456	49.8416	76.6612
520.5	1.2217	24.6708	49.8896	76.734
520.6	1.22542	24.696	49.9376	76.8068
520.7	1.22914	24.723	49.9872	76.8796
520.8	1.23288	24.7482	50.0352	76.9524
520.9	1.2366	24.7752	50.0832	77.0252
521	1.24032	24.8004	50.1312	77.098
521.1	1.24404	24.8256	50.1808	77.1722
521.2	1.24776	24.8526	50.2288	77.245
521.3	1.24504	24.8454	50.208	77.1974
521.4	1.24074	24.831	50.1728	77.1204
521.5	1.23644	24.8166	50.136	77.0434
521.6	1.23214	24.8022	50.0992	76.9664
521.7	1.22786	24.786	50.064	76.8908
521.8	1.22358	24.7716	50.0272	76.8152
521.9	1.21932	24.7572	49.992	76.7396
522	1.21506	24.7428	49.9568	76.664
522.1	1.21082	24.7302	49.9216	76.5884
522.2	1.20658	24.7158	49.8864	76.5142
522.3	1.20236	24.7014	49.8512	76.4386
522.4	1.19814	24.687	49.816	76.3644
522.5	1.19394	24.6726	49.7808	76.2902
522.6	1.18974	24.6582	49.7456	76.2174
522.7	1.18554	24.6456	49.712	76.1432
522.8	1.18136	24.6312	49.6768	76.0704
522.9	1.17718	24.6168	49.6432	75.9962
523	1.17302	24.6042	49.608	75.9234
523.1	1.16886	24.5898	49.5744	75.8506
523.2	1.16472	24.5772	49.5408	75.7792
523.3	1.16058	24.5628	49.5072	75.7064
523.4	1.15646	24.5502	49.4736	75.635
523.5	1.15234	24.5358	49.44	75.5636
523.6	1.14854	24.5232	49.4048	75.4908
523.7	1.1502	24.498	49.3488	75.4096
523.8	1.15184	24.4728	49.2912	75.327
523.9	1.1535	24.4476	49.2336	75.2444
524	1.15516	24.4224	49.176	75.1618
524.1	1.15682	24.3972	49.1184	75.0792
524.2	1.15848	24.372	49.0608	74.9966
524.3	1.16014	24.3468	49.0016	74.914
524.4	1.1618	24.3216	48.944	74.8314
524.5	1.16346	24.2964	48.8864	74.7488
524.6	1.16512	24.2694	48.8288	74.6662
524.7	1.1668	24.2442	48.7712	74.5822
524.8	1.16846	24.219	48.712	74.4996
524.9	1.17012	24.1938	48.6544	74.4156
525	1.17178	24.1686	48.5968	74.333
525.1	1.17346	24.1434	48.5376	74.249
525.2	1.17512	24.1164	48.48	74.1664
525.3	1.17678	24.0912	48.4208	74.0824
525.4	1.17846	24.066	48.3632	73.9984
525.5	1.18012	24.0408	48.304	73.9144
525.6	1.1818	24.0156	48.2464	73.8318
525.7	1.18346	23.9886	48.1872	73.7478
525.8	1.18514	23.9634	48.128	73.6638
525.9	1.18682	23.9382	48.0704	73.5798
526	1.1863	23.8986	47.9872	73.4552
526.1	1.18194	23.8392	47.8624	73.2606
526.2	1.1776	23.778	47.7392	73.066
526.3	1.17324	23.7186	47.6144	72.8728
526.4	1.1689	23.6574	47.4912	72.6782
526.5	1.16456	23.598	47.3664	72.485
526.6	1.16024	23.5386	47.2432	72.2918
526.7	1.1559	23.4774	47.12	72.0986
526.8	1.15158	23.418	46.9968	71.9068
526.9	1.14726	23.3586	46.8736	71.7136
527	1.14294	23.2974	46.7504	71.5218
527.1	1.13864	23.238	46.6272	71.33
527.2	1.13432	23.1786	46.5056	71.1382
527.3	1.13002	23.1192	46.3824	70.9464
527.4	1.12572	23.0598	46.2592	70.7546
527.5	1.12144	23.0004	46.1376	70.5628
527.6	1.11714	22.941	46.016	70.3724
527.7	1.11286	22.8816	45.8928	70.182
527.8	1.10858	22.8222	45.7712	69.9916
527.9	1.10432	22.7628	45.6496	69.8012
528	1.10004	22.7034	45.528	69.6108
528.1	1.09578	22.644	45.4064	69.4204
528.2	1.09152	22.5864	45.2848	69.2314
528.3	1.08726	22.527	45.1648	69.0424
528.4	1.08312	22.4496	45.0096	68.803
528.5	1.07902	22.365	44.8432	68.5454
528.6	1.07492	22.2804	44.6768	68.2878
528.7	1.07082	22.1958	44.5104	68.0316
528.8	1.06674	22.113	44.344	67.7754
528.9	1.06268	22.0284	44.1776	67.5192
529	1.0586	21.9456	44.0128	67.2644
529.1	1.05454	21.861	43.848	67.0096
529.2	1.0505	21.7782	43.6832	66.7548
529.3	1.04644	21.6936	43.5184	66.5
529.4	1.0424	21.6108	43.3536	66.2466
529.5	1.03838	21.528	43.1904	65.9946
529.6	1.03436	21.4452	43.0256	65.7412
529.7	1.03034	21.3624	42.8624	65.4892
529.8	1.02632	21.2796	42.6992	65.2372
529.9	1.02232	21.1968	42.536	64.9866
530	1.01832	21.1158	42.3744	64.7346
530.1	1.01434	21.033	42.2112	64.484
530.2	1.01036	20.9502	42.0496	64.2348
530.3	1.00638	20.8692	41.888	63.9842
530.4	1.0024	20.7882	41.7264	63.735
530.5	0.99844	20.7054	41.5648	63.4872
530.6	0.9945	20.6244	41.4048	63.238
530.7	0.99132	20.5434	41.2448	62.9958
530.8	0.99296	20.4678	41.088	62.7816
530.9	0.9946	20.3922	40.9328	62.5688
531	0.99626	20.3148	40.776	62.3546
531.1	0.9979	20.2392	40.6208	62.1418
531.2	0.99954	20.1636	40.4656	61.929
531.3	1.00118	20.088	40.3104	61.7162
531.4	1.00282	20.0124	40.1552	61.5034
531.5	1.00446	19.9368	40	61.292
531.6	1.0061	19.8594	39.8448	61.0792
531.7	1.00776	19.7838	39.6896	60.8678
531.8	1.0094	19.7082	39.5344	60.655
531.9	1.01104	19.6344	39.3808	60.4436
532	1.01268	19.5588	39.2256	60.2322
532.1	1.01432	19.4832	39.072	60.0208
532.2	1.01596	19.4076	38.9168	59.8094
532.3	1.0176	19.332	38.7632	59.598
532.4	1.01924	19.2564	38.6096	59.388
532.5	1.02088	19.1808	38.4544	59.1766
532.6	1.02252	19.107	38.3008	58.9666
532.7	1.02416	19.0314	38.1472	58.7566
532.8	1.0258	18.9558	37.9936	58.5466
532.9	1.02744	18.882	37.84	58.3352
533	1.02908	18.8064	37.6864	58.1266
533.1	1.02374	18.72	37.5216	57.8858
533.2	1.01394	18.6282	37.3472	57.6268
533.3	1.00416	18.5364	37.1744	57.3678
533.4	0.9944	18.4446	37.0016	57.1088
533.5	0.98466	18.3528	36.8288	56.8512
533.6	0.97492	18.2592	36.656	56.5936
533.7	0.9652	18.1692	36.4832	56.336
533.8	0.9555	18.0774	36.312	56.0784
533.9	0.94582	17.9854	36.1392	55.8222
534	0.93614	17.8942	35.968	55.566
534.1	0.9265	17.8031	35.7968	55.3112
534.2	0.91684	17.7122	35.6256	55.0564
534.3	0.90722	17.6213	35.456	54.8016
534.4	0.8976	17.5307	35.2848	54.5468
534.5	0.888	17.4402	35.1152	54.2934
534.6	0.87842	17.3498	34.9456	54.04
534.7	0.86884	17.2597	34.776	53.7866
534.8	0.85928	17.1695	34.6064	53.5346
534.9	0.84974	17.0797	34.4384	53.2826
535	0.84022	16.9898	34.2688	53.0306
535.1	0.8307	16.9002	34.1008	52.7786
535.2	0.8212	16.8107	33.9328	52.528
535.3	0.8117	16.7213	33.7648	52.2774
535.4	0.80386	16.6351	33.5984	52.0296
535.5	0.80616	16.567	33.4368	51.7958
535.6	0.80844	16.499	33.2768	51.562
535.7	0.81074	16.4309	33.1152	51.3268
535.8	0.81304	16.3631	32.9552	51.093
535.9	0.81534	16.295	32.7952	50.8592
536	0.81762	16.2272	32.6336	50.6268
536.1	0.81992	16.1595	32.4736	50.393
536.2	0.82222	16.0916	32.3136	50.1592
536.3	0.8245	16.024	32.1536	49.9268
536.4	0.8268	15.9561	31.9936	49.693
536.5	0.8291	15.8884	31.8336	49.4606
536.6	0.83138	15.8209	31.6736	49.2282
536.7	0.83368	15.7532	31.5136	48.9958
536.8	0.83596	15.6857	31.3536	48.7634
536.9	0.83826	15.6182	31.1936	48.531
537	0.84054	15.5507	31.0336	48.2986
537.1	0.84284	15.4832	30.8752	48.0662
537.2	0.84512	15.4159	30.7152	47.8338
537.3	0.8474	15.3486	30.5552	47.6028
537.4	0.8497	15.2813	30.3968	47.3704
537.5	0.85198	15.214	30.2368	47.1394
537.6	0.85426	15.1466	30.0784	46.9084
537.7	0.85656	15.0795	29.9184	46.676
537.8	0.85226	15.0088	29.7728	46.4548
537.9	0.84542	14.9366	29.632	46.2378
538	0.8386	14.8646	29.4928	46.0208
538.1	0.8318	14.7929	29.352	45.8038
538.2	0.82502	14.7211	29.2128	45.5868
538.3	0.81824	14.6497	29.0736	45.3712
538.4	0.81146	14.5782	28.9344	45.1556
538.5	0.80472	14.5071	28.7952	44.9414
538.6	0.79798	14.436	28.656	44.7272
538.7	0.79124	14.3649	28.5184	44.513
538.8	0.78452	14.2942	28.3808	44.2988
538.9	0.77782	14.2234	28.2416	44.0846
539	0.77112	14.1529	28.104	43.8718
539.1	0.76444	14.0825	27.968	43.6604
539.2	0.75778	14.0123	27.8304	43.4476
539.3	0.75112	13.9421	27.6944	43.2362
539.4	0.74448	13.8721	27.5568	43.0248
539.5	0.73784	13.8022	27.4208	42.8148
539.6	0.73122	13.7326	27.2848	42.6034
539.7	0.7246	13.6629	27.1488	42.3934
539.8	0.718	13.5934	27.0144	42.1834
539.9	0.71142	13.5239	26.8784	41.9748
540	0.70484	13.4548	26.744	41.7662
540.1	0.69798	13.3884	26.6112	41.566
540.2	0.6906	13.3268	26.48	41.3826
540.3	0.68322	13.2651	26.3504	41.1992
540.4	0.67582	13.2034	26.2208	41.0144
540.5	0.66842	13.1418	26.0912	40.831
540.6	0.66104	13.0801	25.96	40.6476
540.7	0.65364	13.0183	25.8304	40.4628
540.8	0.64624	12.9566	25.7008	40.2794
540.9	0.63884	12.8948	25.5696	40.0946
541	0.63144	12.8331	25.44	39.9112
541.1	0.62404	12.7714	25.3088	39.7264
541.2	0.61662	12.7094	25.1792	39.5416
541.3	0.60922	12.6477	25.0496	39.3582
541.4	0.6018	12.5858	24.9184	39.1734
541.5	0.5944	12.524	24.7888	38.9886
541.6	0.58698	12.4621	24.6576	38.8052
541.7	0.57956	12.4002	24.5264	38.6204
541.8	0.57214	12.3383	24.3968	38.4356
541.9	0.56472	12.2764	24.2656	38.2508
542	0.5573	12.2144	24.136	38.066
542.1	0.54988	12.1525	24.0048	37.8826
542.2	0.54246	12.0906	23.8736	37.6978
542.3	0.53504	12.0285	23.744	37.513
542.4	0.52834	11.9668	23.6144	37.3282
542.5	0.53432	11.9095	23.5008	37.149
542.6	0.5403	11.8523	23.3872	36.9698
542.7	0.54628	11.795	23.2736	36.7906
542.8	0.55226	11.738	23.16	36.6114
542.9	0.55824	11.6807	23.0464	36.4322
543	0.56422	11.6235	22.9328	36.2544
543.1	0.5702	11.5664	22.8192	36.0752
543.2	0.57618	11.5092	22.7056	35.896
543.3	0.58216	11.4521	22.5936	35.7168
543.4	0.58814	11.3951	22.48	35.539
543.5	0.5941	11.3378	22.3664	35.3598
543.6	0.60008	11.2808	22.2528	35.1806
543.7	0.60606	11.2237	22.1392	35.0028
543.8	0.61202	11.1667	22.0272	34.8236
543.9	0.618	11.1096	21.9136	34.6458
544	0.62398	11.0525	21.8	34.4666
544.1	0.62994	10.9955	21.688	34.2888
544.2	0.63592	10.9384	21.5744	34.1096
544.3	0.64188	10.8814	21.4608	33.9318
544.4	0.64786	10.8245	21.3472	33.7526
544.5	0.65382	10.7674	21.2352	33.5748
544.6	0.6598	10.7104	21.1216	33.3956
544.7	0.66576	10.6535	21.008	33.2178
544.8	0.664	10.5998	20.9008	33.0358
544.9	0.66038	10.5467	20.7936	32.8524
545	0.65676	10.4938	20.688	32.669
545.1	0.65314	10.4407	20.5808	32.4842
545.2	0.6495	10.3874	20.4736	32.3008
545.3	0.64588	10.3342	20.3664	32.116
545.4	0.64222	10.2809	20.2592	31.9312
545.5	0.63858	10.2274	20.1504	31.7464
545.6	0.63492	10.174	20.0432	31.5616
545.7	0.63128	10.1205	19.9344	31.3754
545.8	0.6276	10.0669	19.8272	31.1892
545.9	0.62394	10.013	19.7184	31.003
546	0.62026	9.95922	19.6112	30.8168
546.1	0.6166	9.9054	19.5024	30.6306
546.2	0.6129	9.85158	19.3936	30.4444
546.3	0.60922	9.7974	19.2848	30.2568
546.4	0.60552	9.7434	19.176	30.0692
546.5	0.60182	9.68922	19.0656	29.8816
546.6	0.59812	9.63504	18.9568	29.694
546.7	0.59442	9.58068	18.848	29.5064
546.8	0.5907	9.52632	18.7376	29.3174
546.9	0.58698	9.47178	18.6288	29.1298
547	0.58326	9.41724	18.5184	28.9408
547.1	0.58012	9.36882	18.4176	28.7756
547.2	0.57732	9.324	18.32	28.6244
547.3	0.57454	9.27936	18.224	28.4746
547.4	0.57176	9.23472	18.128	28.3234
547.5	0.56898	9.1899	18.032	28.1722
547.6	0.5662	9.14526	17.936	28.0224
547.7	0.5634	9.10044	17.8384	27.8712
547.8	0.56062	9.05562	17.7424	27.72
547.9	0.55782	9.0108	17.6464	27.5688
548	0.55502	8.96598	17.5488	27.4176
548.1	0.55224	8.92116	17.4528	27.2664
548.2	0.54944	8.87616	17.3568	27.1152
548.3	0.54664	8.83134	17.2592	26.964
548.4	0.54384	8.78634	17.1632	26.8128
548.5	0.54104	8.74134	17.0656	26.6616
548.6	0.53824	8.69634	16.9696	26.509
548.7	0.53544	8.65134	16.872	26.3578
548.8	0.53264	8.60634	16.776	26.2066
548.9	0.52984	8.56134	16.6784	26.054
549	0.52702	8.51616	16.5808	25.9028
549.1	0.52422	8.47116	16.4848	25.7502
549.2	0.5214	8.42598	16.3872	25.5976
549.3	0.5186	8.3808	16.2896	25.4464
549.4	0.51898	8.33544	16.1984	25.3036
549.5	0.52284	8.28972	16.1152	25.172
549.6	0.5267	8.24382	16.0304	25.039
549.7	0.53056	8.1981	15.9456	24.9074
549.8	0.53442	8.1522	15.8613	24.7744
[truncated: 2,502 more rows]

## Sheet: PL+SD
	plant height					stem diameter
	CK	T1	T2	T3		CK	T1	T2	T3
1	51.1	54.58	55.55	57		4.29	4.33	4.78	4.59
2	51.57	55.08	58.12	57.74		4.29	4.38	4.44	4.32
3	52.05	55.76	53.4	59.23		4.21	4.53	5.04	4.6
4	53.34	56.58	54.78	60.66		4.34	4.43	5.12	4.49
5	53.77	56.65	56.54	60.8		4.21	4.64	4.61	4.48
6	54.58	59.26	57.59	62.33		4.46	4.91	4.29	4.31
7	56.62	59.58	57.78	63.31		4.41	4.22	4.77	4.11
8	57.25	59.8	57.88	63.73		4.55	4.23	4.45	4.18
9	56.18	51.71	55.69	64.35		4.06	4.97	4.76	4.35
10	54.58	57.93	63.81	64.57		4.44	4.24	4.46	4.27
11	55.76	56.693	58.78	64.8		4.56	4.66	4.47	4.44
12	55.08	57.78	57.88	65.42		4.37	4.56	4.98	4.35
13	54.04	56.54	56.54	55.69		4.08	4.57	5.01	4.22
14	55.09	57.59	60.19	57.23		4.04	4.55	4.88	4.08
15	54.04	55.2	61.31	57.65		4.06	4.43	4.76	4.12

## Sheet: AREA
	AREA /cm2
CK	428.813
CK	416.748
CK	424.036
CK	436.356
CK	431.695
T11	465.39
T12	471.623
T13	433.268
T14	454.882
T15	463.932
T21	446.623
T22	441.472
T23	457.536
T24	423.983
T25	455.655
T31	447.01
T32	427.813
T33	442.871
T34	430.823
T35	447.62

## Sheet: FWDW
		FW				DW
		leaf/g	stem/g	root(g)		leaf/g	stem/g	root(g)		shoot FW	shoot DW
CK	1	3.7981	1.8361	0.9001	CK	0.5863	0.1423	0.0683		5.6342	0.7286
	2	3.8034	1.8694	1.0608		0.5997	0.1513	0.0547		5.6728	0.751
	3	3.8982	1.8943	1.0718		0.6111	0.1693	0.0569		5.9822	0.7804
	4	4.1794	2.084	1.0861		0.6129	0.1702	0.0607		6.0737	0.7831
	5	4.1941	2.1462	1.1269		0.6461	0.1734	0.0697		6.3403	0.8195
T1	1	4.4051	2.0942	0.9909	T1	0.6903	0.1699	0.1051		6.4993	0.8602
	2	4.3596	2.5759	1.2309		0.6498	0.1683	0.0937		6.9355	0.8181
	3	4.3426	2.3345	1.1045		0.6136	0.2044	0.0868		6.6771	0.818
	4	4.2581	2.2551	1.1405		0.6396	0.1817	0.0855		6.5132	0.8213
	5	3.9159	1.8452	1.1869		0.6474	0.1777	0.0915		5.7611	0.8251
T2	1	4.0762	2.0478	2.0629	T2	0.6376	0.1566	0.1296		6.124	0.7949
	2	4.3986	2.0984	1.8107		0.6511	0.1921	0.1341		6.497	0.8334
	3	3.8122	1.7965	0.7285		0.5971	0.1821	0.0495		5.6087	0.8546
	4	4.2259	2.1909	1.7629		0.6192	0.1778	0.1065		6.4168	0.8682
	5	4.3753	2.2384	1.5307		0.6934	0.1794	0.0945		6.6137	0.8299
T3	1	4.4815	2.0975	1.0811	T3	0.6317	0.1632	0.0668		6.124	0.7942
	2	4.3419	2.3349	1.9345		0.6361	0.1973	0.1199		6.497	0.8432
	3	4.2359	1.9916	1.7633		0.6783	0.1763	0.1108		6.0506	0.7792
	4	4.4018	2.5941	0.9026		0.6661	0.2021	0.0555		6.4168	0.797
	5	3.9788	2.3722	2.0761		0.6514	0.1785	0.1257		6.1718	0.8728

## Sheet: ROOT
RHIZO 2013e	Length(cm)	AvgDiam(mm)	Tips	RootVolume(cm3)
CK-1.jpg	570.003	0.3062	1430	0.419524
CK-2.jpg	529.308	0.3305	2138	0.45386
CK-3.jpg	681.32	0.3138	1947	0.526656
CK-4.jpg	755.685	0.2307	3525	0.315723
CK-5.jpg	688.778	0.3165	2379	0.541622
T1-1.jpg	680.231	0.3342	3337	0.596402
T1-2.jpg	830.754	0.304	4718	0.602683
T1-3.jpg	537.457	0.3552	4643	0.532304
T1-4.jpg	1039.64	0.2883	4026	0.67833
T1-5.jpg	1066.44	0.2691	6876	0.606224
T2-1.jpg	660.053	0.4278	2905	0.948266
T2-2.jpg	590.698	0.4578	4905	0.971823
T2-3.jpg	742.776	0.4183	3500	1.02024
T2-4.jpg	637.457	0.3852	4643	0.742495
T2-5.jpg	769.86	0.3296	4413	0.656532
T3-1.jpg	622.894	0.4368	2976	0.932931
T3-2.jpg	618.566	0.4277	2093	0.888248
T3-3.jpg	1164.61	0.3242	3514	0.960895
T3-4.jpg	881.594	0.386	4573	1.03113
T3-5.jpg	1113.46	0.3271	5425	0.935199

## Sheet: LMA
	weighing bottle DW/g	weighing bottle+leaf FW/g	weighing bottle+leaf DW/g	leaf FW	leaf DW	Hole punch area/cm2	leaf disc number	leaf area/cm2	FW/AREA g/cm2	DW/AREA g/cm2	FW/AREA g/m2	DW/AREA g/m2
CK1	35.0209	35.7561	35.1621	0.7352	0.1412	0.5	100	50	0.014704	0.002824	147.04	28.24
CK2	34.5447	35.2305	34.6783	0.6858	0.1336	0.5	100	50	0.013716	0.002672	137.16	26.72
CK3	34.2954	35.0258	34.4362	0.7304	0.1408	0.5	100	50	0.014608	0.002816	146.08	28.16
T11	36.895	37.643	37.054	0.748	0.159	0.5	100	50	0.01496	0.00318	149.6	31.8
T12	35.4578	36.2234	35.6146	0.7656	0.1568	0.5	100	50	0.015312	0.003136	153.12	31.36
T13	34.0492	34.7952	34.1962	0.746	0.147	0.5	100	50	0.01492	0.00294	149.2	29.4
T21	33.7629	34.5125	33.9127	0.7496	0.1498	0.5	100	50	0.014992	0.002996	149.92	29.96
T22	34.3311	35.1041	34.4829	0.773	0.1518	0.5	100	50	0.01546	0.003036	154.6	30.36
T23	36.5933	37.3355	36.7589	0.7422	0.1656	0.5	100	50	0.014844	0.003312	148.44	33.12
t31	34.1629	34.8985	34.3043	0.7356	0.1414	0.5	100	50	0.014712	0.002828	147.12	28.28
t32	36.3046	37.049	36.4468	0.7444	0.1422	0.5	100	50	0.014888	0.002844	148.88	28.44
t33	34.8287	35.5749	34.9811	0.7462	0.1524	0.5	100	50	0.014924	0.003048	149.24	30.48

## Sheet: ABA
ABA
Level	Enabled	Resp.	Exp. Conc	Resp. Factor
1	x	11	0.8200	13.9070
2	x	53	8.1800	6.4808
3	x	280	81.7700	3.4204
4		1937	163.5400	11.8428
5	x	1240	327.0800	3.7910
6		1347	490.6300	2.7448
ABA
				(μg/ml)
Data File	RT	Resp.	Fine丨Conc	ABA	ug/g
CK1	5.569	13	2.5595	2.5595	10.238
CK2	5.576	12	2.1793	2.1793	8.7172
CK4	5.576	12	2.3888	2.3888	9.5552
T11	5.569	27	6.2408	6.2408	24.9632
T12	5.576	22	4.9219	4.9219	19.6876
T13	5.576	18	3.8095	3.8095	15.238
t22	5.576	42	10.3822	10.3822	41.5288
t23	5.576	38	9.2722	9.2722	37.0888
t24	5.583	33	7.9638	7.9638	31.8552
t33	5.576	17	8.6841	8.6841	34.7364
t34	5.576	26	6.0845	6.0845	24.338
t35	5.561	22	5.0738	5.0738	20.2952

## Sheet: GABA
standard curve of GABA：
N.	signal	compound	Level	Conc[mg/L]	area
1	VWD1 A	GABA	6	0.2575	58.298
			5	0.515	101.69
			4	1.03	204.04
			3	2.575	497.69
			2	5.115	978.67
			1	10.3	1984.4
N.	Data File	sample quality（g）	peak area	Conc（μg/g)
1	GABA-CK1	0.4585	709.572	32.0568
2	GABA-CK2	0.4590	711.379	32.104
3	GABA-CK3	0.4607	708.404	31.8509
4	GABA-T11	0.3651	576.555	32.6623
5	GABA-T12	0.4035	578.464	29.6525
6	GABA-T13	0.4110	574.125	28.8913
7	GABA-T21	0.4087	684.557	34.6869
8	GABA-T22	0.4037	686.483	35.216
9	GABA-T23	0.4054	684.55	34.9689
10	GABA-T31	0.4348	896.701	42.7765
11	GABA-T32	0.4140	897.899	44.986
12	GABA-T33	0.4130	894.688	44.9328

## Sheet: photosynthetic
								1		WUE=Pn/gs			IWUE=Pn/E
	E3	E6	E9	gs3	gs6	gs9	pn3	pn6	pn9	wue3	wue6	wue9	iwue3	iwue6	iwue9
CK1	5.9	4.2	0.7	232	138	27	9.7	6.7	2.9	41.8103	48.5507	107.407	1.64407	1.59524	4.14286
CK2	6.2	3.9	0.6	226	114	28	10	5.9	2.9	44.2478	51.7544	103.571	1.6129	1.51282	4.83333
CK3	5.7	4.1	0.6	201	118	29	9.8	6.3	2.8	48.7562	53.3898	96.5517	1.7193	1.53659	4.66667
T11	5.3	3.5	0.4	226	106	26	10	8.6	2.8	44.2478	81.1321	107.692	1.88679	2.45714	7
T12	5.2	3.1	0.5	203	115	27	10.3	7.9	3	50.7389	68.6957	111.111	1.98077	2.54839	6
T13	5.9	3	0.6	200	108	25	9.5	7.5	3.1	47.5	69.4444	124	1.61017	2.5	5.16667
T21	5.7	2.5	0.5	216	102	26	10.1	9.1	3.1	46.7593	89.2157	119.231	1.77193	3.64	6.2
T22	4.9	2.1	0.4	196	100	24	10.1	8.6	2.9	51.5306	86	120.833	2.06122	4.09524	7.25
T23	4.6	2.3	0.4	206	96	24	9.2	8.2	3	44.6602	85.4167	125	2	3.56522	7.5
T31	4.5	2.8	0.5	199	89	23	8.5	7	2.9	42.7136	78.6517	126.087	1.88889	2.5	5.8
T32	5.8	1.9	0.4	212	95	21	9.5	7.3	2.5	44.8113	76.8421	119.048	1.63793	3.84211	6.25
T33	5.4	1.9	0.4	217	100	23	10	6.8	2.8	46.0829	68	121.739	1.85185	3.57895	7							Ci3

## Sheet: CHL
10.1	440	645	663		CA	cb	ca+b	car
CK	0.118	0.035	0.066		0.75085	0.49258	1.23947	0.219943
CK	0.133	0.039	0.072		0.81699	0.55608	1.36875	0.255537
CK	0.149	0.037	0.071		0.80942	0.51499	1.32015	0.343859
T11	0.133	0.04	0.084		0.9674	0.52292	1.48528	0.224074
T12	0.148	0.042	0.082		0.93672	0.57802	1.50982	0.287949
T13	0.171	0.05	0.094		1.069	0.70502	1.76838	0.326237
T21	0.142	0.041	0.083		0.95206	0.55047	1.49755	0.263062
T22	0.17	0.046	0.092		1.05386	0.62284	1.67118	0.347781
T23	0.171	0.048	0.108		1.25268	0.59388	1.84008	0.306878
T31	0.115	0.034	0.071		0.81719	0.44635	1.25928	0.200494
T32	0.138	0.041	0.079		0.90106	0.56915	1.46547	0.252923
T33	0.147	0.043	0.084		0.95963	0.59156	1.54615	0.27344

[truncated: 9 more sheets: WATER Content, water potential, O2-, H2O2, EC, MDA, GAD2+ALMT9, Stomatal size, stomatal density]
