# Supplementary material for: Green Light Partial Replacement of Red and Blue Light Improved Drought Tolerance by Regulating Water Use Efficiency in Cucumber Seedlings
Source: Front Plant Sci. 2022 May 31;13:878932. doi: 10.3389/fpls.2022.878932 (PMC9194611; doi:10.3389/fpls.2022.878932)
Supplement: Supplementary file 4 [file Table_4.XLSX]

## Sheet: soil weight
	DW	Turgid W	FW	FW	FW	FW		Water content				%
			0d	3d	6d	9d		0d	3d	6d	9d	0d	3d	6d	9d
CK	119.67	428.419	422.6	332.8	209.4	147.8		2.53138	1.78098	0.749812	0.235063	0.981154	0.690303	0.290625	0.0911097
CK	122.47	438.443	435.3	334.6	218.7	150.4		2.55434	1.7321	0.785743	0.228056	0.990054	0.671356	0.304552	0.0883937
CK	121.07	433.431	431.6	340.8	237	159.8		2.56488	1.8149	0.957545	0.319898	0.994139	0.70345	0.371142	0.123991
T1	122.07	437.011	433.8	348.3	222.1	159.9		2.5537	1.85328	0.819448	0.309904	0.989806	0.718326	0.317615	0.120118
T1	122.41	438.228	433.4	327.7	221.5	163.3		2.54056	1.67707	0.809493	0.334041	0.984713	0.650027	0.313757	0.129473
T1	121.66	435.543	432.4	341.9	233.9	156.9		2.55417	1.81029	0.922571	0.28966	0.989987	0.701663	0.357586	0.112271
T2	121.04	433.323	431.5	334	225.2	165.6		2.56494	1.75942	0.860542	0.368143	0.994162	0.681945	0.333543	0.142691
T2	119.37	427.345	424.2	336.3	219.7	153		2.55366	1.81729	0.840496	0.281729	0.989789	0.704376	0.325774	0.109197
T2	119.44	427.595	423	334.3	205.2	147.4		2.54153	1.79889	0.718017	0.234092	0.985088	0.697246	0.278301	0.0907335
T3	119.84	429.027	427.2	332.7	228	147.7		2.56475	1.7762	0.902537	0.232477	0.99409	0.68845	0.34982	0.0901072
T3	122.62	438.98	434.5	341.5	220.5	153.1		2.54347	1.78503	0.798238	0.248573	0.98584	0.691871	0.309395	0.0963461
T3	119.65	428.347	423.8	339.2	210.6	158.3		2.542	1.83494	0.760134	0.323025	0.98527	0.711215	0.294625	0.125204
